# Supplementary material for: Synthesis and X-ray study of dispiro 8-nitroquinolone analogues and their cytotoxic properties against human cervical cancer HeLa cells
Source: Royal Society of Chemistry journal article supplement (doi:10.1039/c8md00482j), 2019-01-01
Supplement: c8md00482j1.pdf [file c8md00482j1.pdf]

## Synthesis and X-ray Study of Dispiro 8-Nitroquinolone Analogues and Their Cytotoxic Properties Against Human Cervical Cancer Cells HeLa

Selvaraj Shyamsivappan<sup>a</sup>, Raju Vivek<sup>b</sup>, Arjunan Saravanan<sup>c</sup>, Thangaraj Arasakumar<sup>a</sup>, Gopalan Subashini<sup>d</sup>, Thangaraj Suresh<sup>a</sup>, Ramasamy Shankar<sup>e</sup>, Palathurai Subramaniam Mohan<sup>a,\*</sup>

<sup>a</sup>School of Chemical Sciences, Bharathiar University, Coimbatore, Tamil Nadu, India.

<sup>b</sup>Chemical Biology, Rajiv Gandhi Centre for Biotechnology, Thiruvananthapuram, Kerala, India.

<sup>c</sup>DRDO-BU CLS, Bharathiar University campus, Coimbatore, Tamil Nadu, India.

<sup>d</sup>Department of Chemistry, P.S.G.R. Krishnammal College For Women, Coimbatore, Tamilnadu, India

<sup>e</sup> Department of Physics, Bharathiar University, Coimbatore, Tamil Nadu, India

Corresponding author: [psmohan59@gmail.com](mailto:psmohan59@gmail.com) and [ps\\_mohan\\_in@yahoo.com](mailto:ps_mohan_in@yahoo.com)

### Contents

|                                                        |    |
|--------------------------------------------------------|----|
| 1. X-Ray crystal structure of compound <b>61</b> ----- | 2  |
| 2. Experimental details and Characterization Data----- | 5  |
| 3. Copies of Spectroscopic Datas -----                 | 12 |

## 1. X-Ray crystal structure of compound

### Crystallographic data collection and refinement of **6I**

The compound **6I** was crystallized from solvent evaporation solution growth technique. Block type single crystals suitable for X-ray diffraction were chosen from the grown sample. The crystallographic data collection, using the X-ray with wavelength of 0.71073 Å, was collected at room temperature with MoK $\alpha$  radiation using Bruker AXS KAPPA APEX-2 diffractometer equipped with graphite monochromator [1].

**Table 1** Crystallographic parameters of **6I**

|                                   |                                                                                                                           |
|-----------------------------------|---------------------------------------------------------------------------------------------------------------------------|
| Empirical formula                 | C <sub>32</sub> H <sub>25</sub> FN <sub>4</sub> O <sub>5</sub>                                                            |
| Formula weight                    | 564.56                                                                                                                    |
| Temperature                       | 296(2) K                                                                                                                  |
| Wavelength                        | 0.71073 Å                                                                                                                 |
| Crystal system, space group       | Triclinic, P -1                                                                                                           |
| Unit cell dimensions              | a = 7.7342(5) Å $\alpha$ = 97.469(2)°<br>b = 11.9996(8) Å $\beta$ = 92.265(2)°<br>c = 14.6465(10) Å $\gamma$ = 91.035(2)° |
| Volume                            | 1346.35(16) Å <sup>3</sup>                                                                                                |
| Z, Calculated density             | 2, 1.393 Mg/m <sup>3</sup>                                                                                                |
| Absorption coefficient            | 0.100 mm <sup>-1</sup>                                                                                                    |
| F(000)                            | 588                                                                                                                       |
| Crystal size                      | 0.432 × 0.216 × 0.199 mm                                                                                                  |
| Theta range for data collection   | 2.352 to 27.188°                                                                                                          |
| Limiting indices                  | -9 ≤ h ≤ 9, -15 ≤ k ≤ 15, -18 ≤ l ≤ 18                                                                                    |
| Reflections collected / unique    | 41972 / 5937 [R(int) = 0.0229]                                                                                            |
| Completeness to theta = 25.242    | 99.90%                                                                                                                    |
| Refinement method                 | Full-matrix least-squares on F <sup>2</sup>                                                                               |
| Data / restraints / parameters    | 5937 / 0 / 381                                                                                                            |
| Goodness-of-fit on F <sup>2</sup> | 1.046                                                                                                                     |
| Final R indices [I > 2σ(I)]       | R1 = 0.0483, wR2 = 0.1267                                                                                                 |
| R indices (all data)              | R1 = 0.0602, wR2 = 0.1350                                                                                                 |
| Extinction coefficient            | 0.0159(19)                                                                                                                |
| Largest diff. peak and hole       | 0.368 and -0.382 e.Å <sup>-3</sup>                                                                                        |

The structure was solved by direct methods and refined by full-matrix least-squares calculations using SHELXL-2014 [2]. All the H atoms were placed geometrically calculated bond distances, viz., -NH = 0.86 Å, -CH = 0.93 Å (for aromatic), -CH = 0.96 Å (for -CH<sub>3</sub>), -CH = 0.97 Å (for -CH<sub>2</sub>) and -CH = 0.98 Å (for aliphatic) constrained to ride on the concerned parent atom with  $U_{\text{iso}}(\text{H}) = 1.2$  or  $1.5 U_{\text{eq}}$  (parent atom). The crystallographic data, details of data collection and the structure refinement are presented in Table 1. The ORTEP view of the molecules drawn at 50% probability thermal displacement ellipsoids with the atom numbering scheme is shown in Fig. 1 [3].

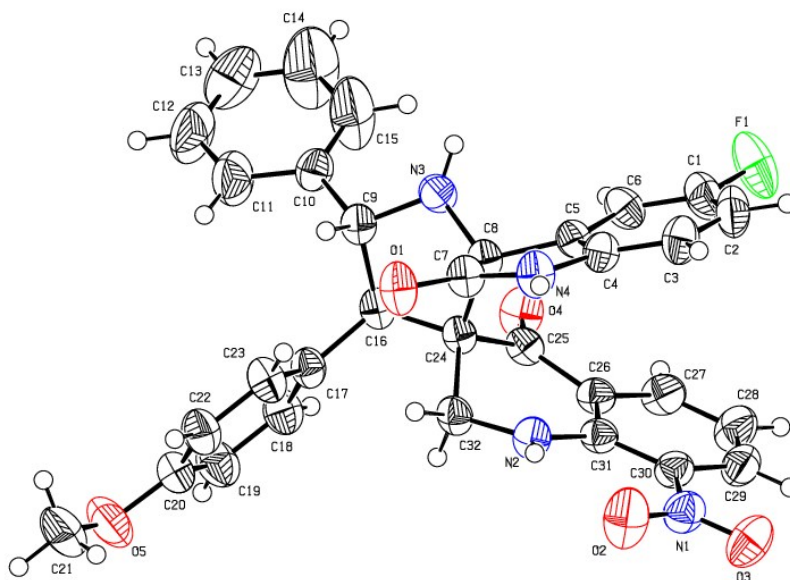

**Figure 1.** Molecular structure of the compound **6I** (CCDC 1843977) with 50% probability thermal displacement ellipsoids

## References

1. Bruker (2001). SAINT and SMART. Bruker AXS Inc., Madison, Wisconsin, USA.
2. G.M. Sheldrick, Acta Cryst. C71 (2015), 3-8.
3. Spek, A. L. (2009). Acta Cryst. D65, 148–155.

**Table 2** The selected optimized geometrical values of theoretical (DFT) and single crystal XRD values of the product 6L at M062x/6-31g\*\* level of theory.

| Bonding type                     | Bond length (Å) |             |
|----------------------------------|-----------------|-------------|
|                                  | Experimental    | Theoretical |
| N <sub>9</sub> -C <sub>24</sub>  | 1.453           | 1.464       |
| C <sub>24</sub> -C <sub>31</sub> | 1.512           | 1.509       |
| C <sub>24</sub> -C <sub>18</sub> | 1.551           | 1.550       |
| C <sub>18</sub> -C <sub>22</sub> | 1.514           | 1.510       |
| C <sub>18</sub> -C <sub>15</sub> | 1.560           | 1.559       |
| C <sub>15</sub> -C <sub>14</sub> | 1.541           | 1.542       |
| C <sub>15</sub> -C <sub>26</sub> | 1.529           | 1.530       |
| C <sub>15</sub> -C <sub>29</sub> | 1.598           | 1.595       |

|                                  |       |       |
|----------------------------------|-------|-------|
| C <sub>29</sub> -N <sub>9</sub>  | 1.449 | 1.447 |
| C <sub>29</sub> -C <sub>20</sub> | 1.509 | 1.513 |
| C <sub>29</sub> -C <sub>21</sub> | 1.555 | 1.560 |
| N <sub>9</sub> -H <sub>10</sub>  | 0.860 | 1.016 |
| C <sub>24</sub> -H <sub>25</sub> | 0.980 | 1.098 |
| C <sub>18</sub> -H <sub>19</sub> | 0.980 | 1.093 |

| <b>Bond Angle (<math>\theta</math>)</b>           |                     |                    |
|---------------------------------------------------|---------------------|--------------------|
| <b>Bonding type</b>                               | <b>Experimental</b> | <b>Theoretical</b> |
| N <sub>9</sub> -C <sub>24</sub> -C <sub>31</sub>  | 112.9               | 111.8              |
| N <sub>9</sub> -C <sub>29</sub> -C <sub>15</sub>  | 103.5               | 101.4              |
| N <sub>9</sub> -C <sub>29</sub> -C <sub>20</sub>  | 112.1               | 113.8              |
| C <sub>14</sub> -C <sub>15</sub> -C <sub>18</sub> | 111.4               | 109.9              |
| C <sub>14</sub> -C <sub>15</sub> -C <sub>26</sub> | 105.5               | 105.6              |
| C <sub>14</sub> -C <sub>15</sub> -C <sub>29</sub> | 107.7               | 108.8              |
| C <sub>18</sub> -C <sub>15</sub> -C <sub>26</sub> | 113.3               | 115.5              |
| C <sub>18</sub> -C <sub>15</sub> -C <sub>29</sub> | 103.6               | 103.8              |
| C <sub>15</sub> -C <sub>18</sub> -H <sub>19</sub> | 106.9               | 105.4              |
| C <sub>15</sub> -C <sub>18</sub> -C <sub>22</sub> | 116.3               | 116.5              |
| C <sub>15</sub> -C <sub>18</sub> -C <sub>24</sub> | 105.7               | 105.6              |
| C <sub>26</sub> -C <sub>15</sub> -C <sub>29</sub> | 115.4               | 113.3              |
| C <sub>15</sub> -C <sub>29</sub> -C <sub>20</sub> | 117.4               | 117.4              |
| C <sub>15</sub> -C <sub>29</sub> -C <sub>21</sub> | 110.1               | 108.9              |
| H <sub>19</sub> -C <sub>18</sub> -C <sub>22</sub> | 106.9               | 107.8              |
| H <sub>19</sub> -C <sub>18</sub> -C <sub>24</sub> | 107.0               | 106.0              |
| C <sub>22</sub> -C <sub>18</sub> -C <sub>24</sub> | 113.6               | 114.7              |
| C <sub>18</sub> -C <sub>24</sub> -H <sub>25</sub> | 109.3               | 109.4              |
| C <sub>18</sub> -C <sub>24</sub> -C <sub>31</sub> | 112.5               | 112.4              |

| <b>Dihedral angle (<math>\theta</math>)</b>                        |                     |                    |
|--------------------------------------------------------------------|---------------------|--------------------|
| <b>Bonding type</b>                                                | <b>Experimental</b> | <b>Theoretical</b> |
| N <sub>9</sub> -C <sub>29</sub> -C <sub>15</sub> -C <sub>14</sub>  | 98.3                | 92.3               |
| N <sub>9</sub> -C <sub>29</sub> -C <sub>15</sub> -C <sub>26</sub>  | -144.2              | -150.6             |
| H <sub>10</sub> -N <sub>9</sub> -C <sub>29</sub> -C <sub>15</sub>  | -142.3              | 169.1              |
| H <sub>10</sub> -N <sub>9</sub> -C <sub>29</sub> -C <sub>21</sub>  | 98.6                | 52.0               |
| H <sub>10</sub> -N <sub>9</sub> -C <sub>24</sub> -C <sub>18</sub>  | 140.2               | -169.4             |
| C <sub>31</sub> -C <sub>24</sub> -C <sub>18</sub> -C <sub>22</sub> | -84.6               | -86.0              |
| C <sub>22</sub> -C <sub>18</sub> -C <sub>15</sub> -C <sub>14</sub> | 114.5               | 115.1              |
| C <sub>22</sub> -C <sub>18</sub> -C <sub>24</sub> -N <sub>9</sub>  | 153.2               | 154.2              |
| C <sub>18</sub> -C <sub>15</sub> -C <sub>29</sub> -C <sub>20</sub> | -143.9              | -149.2             |
| C <sub>18</sub> -C <sub>15</sub> -C <sub>29</sub> -C <sub>21</sub> | 101.4               | 96.7               |
| C <sub>31</sub> -C <sub>24</sub> -C <sub>18</sub> -C <sub>22</sub> | -84.6               | -86.0              |

## 2. Experimental section

### 2.1 Chemistry

#### 2.1.1 General Methods

All chemicals and reagents were purchased from Sigma Aldrich and were used as such. Commercial grade solvents were distilled according to literature procedure. IR Spectra were recorded on JASCO FT IR 4100 spectrometer using KBr disc and the absorption frequencies quoted in reciprocal centimeters.  $^1\text{H}$  and  $^{13}\text{C}$  NMR spectra were recorded on Bruker advance (400 MHz for  $^1\text{H}$  and 100 MHz for  $^{13}\text{C}$ ) DMSO- $d_6$  solvents. The reaction courses were monitored by TLC on silica gel precoated F254 Merck plates. Chemical shifts are reported in  $\delta$  values (ppm) downfield from tetramethylsilane and coupling constants are reported in Hertz (Hz). The following abbreviations are used: singlet (s), doublet (d), triplet (t), quartet (q) and multiplet (m). Elemental analyses were performed on a Perkin Elmer 2400 series II Elemental CHNS analyzer. Mass spectra were obtained on a HR mass spectrometer.

#### 2.1.2 General procedure for synthesis of (*E*)-3-arylidene-2,3-dihydro-8-nitro-4-quinolone (**3a-d**)

An equimolar mixture of 2,3-dihydro-8-nitro-4-quinolone **1** (1 mmol) and the appropriate aldehydes **2a-d** (1 mmol) was dissolved in 15 ml of ethanol, 5 drops of pyrrolidine base were added and stirred at room temperature for 50 min. The solid formed in the reaction mixture was separated by filtration, dried, and recrystallized from the mixture of chloroform/ethanol (1:1) to obtain the pure product **3a-d** in good yields (89-95%).

#### 2.1.3 General procedure for the synthesis of dispiro 8-nitroquinolone analogues **6a-l**

A mixture of Benzylamine **4** (1.2 mmol) and isatin **5** (1 mmol), were refluxed for 10 minutes after that the (*E*)-3-arylidene-2,3-dihydro-8-nitro-4-quinolone (1 mmol) **3a-d** was added slowly to the mixture then the reaction refluxed for 2 - 2.5 hours.. The reaction was monitor by TLC after completion of the reaction the reaction mixture was cooled to room temperature, the solid separated by filtration, dried and recrystallized from the mixture of methanol/dimethylformamide (3:1) to obtain the pure products **6a-l** in good yields (90–96%). Spectral data for all the compounds were given below.

#### **5-Chloro-4'-(4-chlorophenyl)-8''-nitro-5'-phenyl-1'',2''-dihydro-4''*H*-dispiro[indoline-3,2'-pyrrolidine-3',3''-quinoline]-2,4''-dione **6a****

Yellow solid; Yield (92%); mp: 212-220°C; IR (KBr): 3404, 3154, 1701, 1615  $\text{cm}^{-1}$ ;  $^1\text{H}$  NMR (400 MHz, DMSO- $d_6$ ):  $\delta$  10.52 (s, 1H, Isatin N-H), 8.38 (d, 1H,  $J = 5.2$  Hz, Q N-H), 8.07 (dd, 1H,  $J = 6.8$  Hz, Ar-H), 7.96 (dd, 1H,  $J = 6.4$  Hz, Ar-H), 7.20-7.49 (m, 9H, Ar-H), 6.93 (dd, 1H,  $J = 6.0$  Hz, Ar-H), 6.71 (d, 1H,  $J = 2.4$  Hz, Ar-H), 6.49 (t, 1H,  $J = 8.0$  Hz, Ar-H), 6.50 (d, 1H,  $J = 7.6$  Hz, Ar-H), 5.43 (dd, 1H,  $J = 5.2$  Hz, N-CH), 4.59 (d, 1H,  $J = 10.0$  Hz, -CH), 4.06-3.99 (m, 2H, Q- $\text{CH}_2$ ), 2.52-2.49 (m, 1H, Pyrro-N-H);  $^{13}\text{C}$  NMR(100 MHz, DMSO- $d_6$ ):  $\delta$  45.90, 54.02, 58.45, 63.14, 69.79, 110.00, 114.78, 122.40, 124.81, 126.05, 127.35, 128.12, 128.27, 128.38, 130.29, 131.63, 131.68, 131.83, 131.85, 135.64, 135.97, 141.11, 142.02, 144.98, 179.57,

191.06; Anal. Calcd for C<sub>31</sub>H<sub>22</sub>Cl<sub>2</sub>N<sub>4</sub>O<sub>4</sub>; C, 59.11; H, 3.52; N, 8.89; Found C, 59.46; H, 3.48; N, 8.97.

**5-Chloro-4'-(4-bromophenyl)-8''-nitro-5'-phenyl-1'',2''-dihydro-4''H-dispiro[indoline-3,2'-pyrrolidine-3',3''-quinoline]-2,4''-dione 6b**

Yellow solid; Yield (96%); mp: 210-218°C; IR (KBr): 3401, 3166, 1700, 1614 cm<sup>-1</sup>; <sup>1</sup>H NMR (400 MHz, DMSO-*d*<sub>6</sub>): δ 10.52 (s, 1H, Isatin N-H), 8.37 (d, 1H, *J* = 5.2 Hz, Q N-H), 8.07 (dd, 1H, *J* = 6.8 Hz, Ar-H), 7.96 (dd, 1H, *J* = 6 Hz, Ar-H), 7.21-7.53 (m, 9H, Ar-H), 6.93 (dd, 1H, *J* = 6.0 Hz, Ar-H), 6.71 (d, 1H, *J* = 2.4 Hz, Ar-H), 6.49 (t, 1H, *J* = 8.0 Hz, Ar-H), 6.50 (d, 1H, *J* = 8.0 Hz, Ar-H), 5.43 (dd, 1H, *J* = 5.2 Hz, N-CH), 4.57 (d, 1H, *J* = 10.0 Hz, -CH), 4.06-3.99 (m, 2H, Q-CH<sub>2</sub>), 2.52 (d, 1H, *J* = 2.0 Hz, Pyrro-N-H); <sup>13</sup>C NMR(100 MHz, DMSO-*d*<sub>6</sub>): δ 45.90, 54.07, 58.42, 63.05, 69.78, 110.01, 114.79, 120.42, 122.39, 124.81, 126.05, 127.35, 128.13, 128.27, 130.28, 131.30, 131.69, 131.85, 131.99, 135.97, 136.06, 141.11, 142.01, 144.98, 179.56, 191.04; HRMS *m/z* (M+H) 631.0583; Anal. Calcd for C<sub>31</sub>H<sub>22</sub>BrClN<sub>4</sub>O<sub>4</sub>; C, 59.11; H, 3.52; N, 8.89; Found C, 59.46; H, 3.48; N, 8.97.

**5-Chloro-4'-(4-fluorophenyl)-8''-nitro-5'-phenyl-1'',2''-dihydro-4''H-dispiro[indoline-3,2'-pyrrolidine-3',3''-quinoline]-2,4''-dione 6c**

Yellow solid; Yield (94%); mp: 205-214°C; IR (KBr): 3482, 3410, 1702, 1617 cm<sup>-1</sup>; <sup>1</sup>H NMR (400 MHz, DMSO-*d*<sub>6</sub>): δ 10.49 (s, 1H, Isatin N-H), 8.35 (d, 1H, *J* = 4.8 Hz, Q N-H), 8.03 (dd, 1H, *J* = 6.8 Hz, Ar-H), 7.93 (dd, 1H, *J* = 6.0 Hz, Ar-H), 7.46-7.10 (m, 9H, Ar-H), 6.90 (dd, 1H, *J* = 6.0 Hz, Ar-H), 6.86 (d, 1H, *J* = 2.0 Hz, Ar-H), 6.62 (t, 1H, *J* = 8.0 Hz, Ar-H), 6.47 (d, 1H, *J* = 8.4 Hz, Ar-H), 5.40 (dd, 1H, *J* = 5.2 Hz, N-CH), 4.56 (d, 1H, *J* = 9.6 Hz, -CH), 4.02-3.97 (m, 2H, Q-CH<sub>2</sub>), 2.49-2.44 (m, 1H, Pyrro-N-H); <sup>13</sup>C NMR(100 MHz, DMSO-*d*<sub>6</sub>): δ 45.93, 53.88, 58.39, 63.30, 69.78, 109.99, 114.76, 115.06, 115.27, 115.69, 115.90, 122.43, 124.79, 126.04, 127.37, 128.09, 128.24, 130.35, 131.67, 131.85, 132.74, 134.62, 135.96, 136.14, 141.11, 142.13, 144.98, 160.06, 62.48, 179.62, 191.16; Anal. Calcd for C<sub>31</sub>H<sub>22</sub>FCIN<sub>4</sub>O<sub>4</sub>; C, 59.11; H, 3.52; N, 8.89; Found C, 59.46; H, 3.48; N, 8.97

**5-Chloro-4'-(4-methoxyphenyl)-8''-nitro-5'-phenyl-1'',2''-dihydro-4''H-dispiro[indoline-3,2'-pyrrolidine-3',3''-quinoline]-2,4''-dione 6d**

Yellow solid; Yield (91%); mp: 210-218°C; IR (KBr): 3469, 3404, 1700, 1614 cm<sup>-1</sup>; <sup>1</sup>H NMR (400 MHz, DMSO-*d*<sub>6</sub>): δ 10.45 (s, 1H, Isatin N-H), 8.34 (d, 1H, *J* = 4.8 Hz, Q N-H), 8.03 (dd, 1H, *J* = 6.8 Hz, Ar-H), 7.91 (dd, 1H, *J* = 6.0 Hz, Ar-H), 7.47-7.17 (m, 7H, Ar-H), 6.90 - 6.84 (m, 3H, Ar-H), 6.69 (d, 1H, *J* = 2.4 Hz, Ar-H), 6.60 (t, 1H, *J* = 8.0 Hz, Ar-H), 6.46 (d, 1H, *J* = 8.4 Hz, Ar-H), 5.39 (dd, 1H, *J* = 5.2 Hz, N-CH), 4.52 (d, 1H, *J* = 10.0 Hz, -CH), 4.03-3.95 (m, 2H, Q-CH<sub>2</sub>), 3.70 (s, 3H, -OCH<sub>3</sub>), 2.49-2.44 (m, 1H, Pyrro-N-H); <sup>13</sup>C NMR (100 MHz, DMSO-*d*<sub>6</sub>): δ 45.96, 53.84, 54.82, 54.85, 54.92, 58.51, 63.06, 69.66, 109.93, 113.79, 114.35, 114.68,

122.45, 124.77, 126.03, 127.21, 127.41, 128.02, 128.18, 128.23, 130.54, 130.72, 131.61, 131.83, 135.94, 141.09, 142.37, 144.97, 158.24, 179.70, 191.30; Anal. Calcd for C<sub>32</sub>H<sub>25</sub>ClN<sub>4</sub>O<sub>4</sub>; C, 59.11; H, 3.52; N, 8.89; Found C, 59.46; H, 3.48; N, 8.97

**5-Bromo-4'-(4-chlorophenyl)-8''-nitro-5'-phenyl-1'',2''-dihydro-4''H-dispiro[indoline-3,2'-pyrrolidine-3',3''-quinoline]-2,4''-dione 6e**

Yellow solid; Yield (90%); mp: 212-214°C; IR (KBr): 3404, 3178, 1703, 1616 cm<sup>-1</sup>; <sup>1</sup>H NMR (400 MHz, DMSO-*d*<sub>6</sub>): δ 10.51 (s, 1H, Isatin N-H), 8.35 (d, 1H, *J* = 5.2 Hz, Q N-H), 8.04 (dd, 1H, *J* = 6.8 Hz, Ar-H), 7.94 (dd, 1H, *J* = 6 Hz, Ar-H), 7.18-7.46 (m, 9H, Ar-H), 7.02 (dd, 1H, *J* = 6.0 Hz, Ar-H), 6.79 (d, 1H, *J* = 1.6 Hz, Ar-H), 6.63 (t, 1H, *J* = 8.0 Hz, Ar-H), 6.43 (d, 1H, *J* = 8.4 Hz, Ar-H), 5.41 (dd, 1H, *J* = 5.2 Hz, N-CH), 4.55 (d, 1H, *J* = 10.0 Hz, -CH), 4.04-3.95 (m, 2H, Q-CH<sub>2</sub>), 2.49-2.45 (m, 1H, Pyrro-N-H); <sup>13</sup>C NMR(100 MHz, DMSO-*d*<sub>6</sub>): δ 45.92, 54.00, 58.40, 63.15, 69.80, 110.51, 112.48, 114.82, 122.43, 127.34, 128.13, 128.38, 128.81, 130.60, 131.11, 131.67, 131.82, 135.66, 136.01, 141.52, 142.05, 144.97, 179.40, 191.10; Anal. Calcd for C<sub>31</sub>H<sub>22</sub>ClBrN<sub>4</sub>O<sub>4</sub>; C, 59.11; H, 3.52; N, 8.89; Found C, 59.46; H, 3.48; N, 8.97.

**5-Bromo-4'-(4-bromophenyl)-8''-nitro-5'-phenyl-1'',2''-dihydro-4''H-dispiro[indoline-3,2'-pyrrolidine-3',3''-quinoline]-2,4''-dione 6f**

Yellow solid; Yield (93%); mp: 196-206°C; IR (KBr): 3405, 3334, 1699, 1616 cm<sup>-1</sup>; <sup>1</sup>H NMR (400 MHz, DMSO-*d*<sub>6</sub>): δ 10.53 (s, 1H, Isatin N-H), 8.37 (d, 1H, *J* = 4.8 Hz, Q N-H), 8.07 (dd, 1H, *J* = 6.8 Hz, Ar-H), 8.00 (dd, 1H, *J* = 12 Hz, Ar-H), 7.21-7.53 (m, 9H, Ar-H), 7.06 (dd, 1H, *J* = 6.0 Hz, Ar-H), 6.82 (d, 1H, *J* = 7.2 Hz, Ar-H), 6.66 (t, 1H, *J* = 8.0 Hz, Ar-H), 6.46 (d, 1H, *J* = 8.0 Hz, Ar-H), 5.44 (dd, 1H, *J* = 5.2 Hz, N-CH), 4.57 (d, 1H, *J* = 10.0 Hz, -CH), 4.07-3.97 (m, 2H, Q-CH<sub>2</sub>), 2.51 (d, 1H, *J* = 2.0 Hz, Pyrro-N-H); <sup>13</sup>C NMR(100 MHz, DMSO-*d*<sub>6</sub>): δ 45.92, 54.06, 58.37, 63.07, 69.79, 110.51, 112.48, 114.81, 120.41, 122.42, 127.34, 128.13, 128.80, 130.59, 131.11, 131.31, 131.67, 131.85, 132.01, 136.01, 136.08, 141.51, 142.03, 144.96, 179.39, 191.08; Anal. Calcd for C<sub>31</sub>H<sub>22</sub>Br<sub>2</sub>N<sub>4</sub>O<sub>4</sub>; C, 59.11; H, 3.52; N, 8.89; Found C, 59.46; H, 3.48; N, 8.97.

**5-Bromo-4'-(4-fluorophenyl)-8''-nitro-5'-phenyl-1'',2''-dihydro-4''H-dispiro[indoline-3,2'-pyrrolidine-3',3''-quinoline]-2,4''-dione 6g**

Yellow solid; Yield (95%); mp: 204-212°C; IR (KBr): 3407, 3330, 1704, 1614 cm<sup>-1</sup>; <sup>1</sup>H NMR (400 MHz, DMSO-*d*<sub>6</sub>): δ 10.50 (s, 1H, Isatin N-H), 8.35 (d, 1H, *J* = 4.8 Hz, Q N-H), 8.04 (dd, 1H, *J* = 6.8 Hz, Ar-H), 7.94 (dd, 1H, *J* = 6.0 Hz, Ar-H), 7.46-7.10 (m, 9H, Ar-H), 7.02 (dd, 1H, *J* = 6.0 Hz, Ar-H), 6.80 (d, 1H, *J* = 2.4 Hz, Ar-H), 6.63 (t, 1H, *J* = 8.0 Hz, Ar-H), 6.43 (d, 1H, *J* = 8.0 Hz, Ar-H), 5.40 (dd, 1H, *J* = 5.2 Hz, N-CH), 4.56 (d, 1H, *J* = 10.0 Hz, -CH), 4.02-3.95 (m, 2H, Q - CH<sub>2</sub>), 2.49-2.44 (m, 1H, Pyrro-N-H); <sup>13</sup>C NMR(100 MHz, DMSO-*d*<sub>6</sub>): δ 45.95, 53.86, 58.34, 63.32, 69.79, 110.49, 112.47, 114.78, 115.06, 115.27, 122.46, 127.35, 128.10, 128.80, 130.67, 131.08, 131.65, 131.85, 132.75, 136.00, 141.52, 142.15, 144.96, 160.06, 162.48, 179.45,

191.19; Anal. Calcd for C<sub>31</sub>H<sub>22</sub>FBrN<sub>4</sub>O<sub>4</sub>; C, 59.11; H, 3.52; N, 8.89; Found C, 59.46; H, 3.48; N, 8.97

**5-Bromo-4'-(4-methoxyphenyl)-8''-nitro-5'-phenyl-1'',2''-dihydro-4''H-dispiro[indoline-3,2'-pyrrolidine-3',3''-quinoline]-2,4''-dione 6h**

Yellow solid; Yield (90%); mp: 196-204°C; IR (KBr): 3405, 3199, 1694, 1614 cm<sup>-1</sup>; <sup>1</sup>H NMR (400 MHz, DMSO-*d*<sub>6</sub>): δ 10.49 (s, 1H, Isatin N-H), 8.37 (d, 1H, *J* = 5.2 Hz, Q N-H), 8.06 (dd, 1H, *J* = 6.8 Hz, Ar-H), 7.94 (dd, 1H, *J* = 6.8 Hz, Ar-H), 7.48-7.19 (m, 7H, Ar-H), 7.05 (dd, 1H, *J* = 6.4 Hz, Ar-H), 6.89 - 6.78 (m, 3H, Ar-H), 6.64 (t, 1H, *J* = 8.0 Hz, Ar-H), 6.45 (d, 1H, *J* = 8.4 Hz, Ar-H), 5.42 (dd, 1H, *J* = 5.2 Hz, N-CH), 4.55 (d, 1H, *J* = 10.0 Hz, -CH), 4.10-3.98 (m, 2H, Q-CH<sub>2</sub>), 3.71 (s, 3H, -OCH<sub>3</sub>), 2.51-2.46 (m, 1H, Pyrro-N-H); <sup>13</sup>C NMR(100 MHz, DMSO-*d*<sub>6</sub>): δ 45.98, 53.82, 54.91, 54.93, 58.46, 63.08, 69.67, 110.43, 112.45, 113.78, 114.70, 122.48, 127.20, 127.40, 128.02, 128.24, 128.80, 130.73, 130.86, 131.01, 131.59, 131.82, 135.97, 141.50, 142.39, 144.95, 158.24, 179.52, 191.33; HRMS *m/z* (M+H) 627.1083; Anal. Calcd for C<sub>32</sub>H<sub>25</sub>BrN<sub>4</sub>O<sub>4</sub>; C, 59.11; H, 3.52; N, 8.89; Found C, 59.46; H, 3.48; N, 8.97

**5-Fluro-4'-(4-chlorophenyl)-8''-nitro-5'-phenyl-1'',2''-dihydro-4''H-dispiro[indoline-3,2'-pyrrolidine-3',3''-quinoline]-2,4''-dione 6i**

Yellow solid; Yield (92%); mp: 202-210°C; IR (KBr): 3405, 3174, 1704, 1616 cm<sup>-1</sup>; <sup>1</sup>H NMR (400 MHz, DMSO-*d*<sub>6</sub>): δ 10.41 (s, 1H, Isatin N-H), 8.38 (d, 1H, *J* = 4.8 Hz, Q N-H), 8.07 (dd, 1H, *J* = 6.4 Hz, Ar-H), 7.95 (dd, 1H, *J* = 6 Hz, Ar-H), 7.20-7.50 (m, 9H, Ar-H), 6.74 (m, 1H, Ar-H), 6.62 (t, 1H, *J* = 8.0 Hz, Ar-H), 6.55 (dd, 1H, *J* = 6.0 Hz, Ar-H), 6.48 (dd, 1H, *J* = 4.0 Hz, Ar-H), 5.44 (dd, 1H, *J* = 5.2 Hz, N-CH), 4.59 (d, 1H, *J* = 10.0 Hz, -CH), 4.08-4.02 (m, 2H, Q - CH<sub>2</sub>), 2.52 (d, 1H, *J* = 2.0 Hz, Pyrro-N-H); <sup>13</sup>C NMR(100 MHz, DMSO-*d*<sub>6</sub>): δ 45.88, 54.06, 58.56, 63.07, 69.88, 109.33, 109.40, 113.41, 113.66, 114.69, 114.76, 114.92, 122.29, 127.38, 128.10, 128.37, 130.13, 130.21, 131.59, 131.71, 131.81, 135.63, 135.99, 138.41, 141.98, 145.06, 156.03, 158.38, 179.943, 191.003; HRMS *m/z* (M+H) 569.14; Anal. Calcd for C<sub>31</sub>H<sub>22</sub>ClFN<sub>4</sub>O<sub>4</sub>; C, 59.11; H, 3.52; N, 8.89; Found C, 59.46; H, 3.48; N, 8.97.

**5-Fluro-4'-(4-bromophenyl)-8''-nitro-5'-phenyl-1'',2''-dihydro-4''H-dispiro[indoline-3,2'-pyrrolidine-3',3''-quinoline]-2,4''-dione 6j**

Yellow solid; Yield (94%); mp: 202-210°C; IR (KBr): 3400, 3347, 1695, 1616 cm<sup>-1</sup>; <sup>1</sup>H NMR (400 MHz, DMSO-*d*<sub>6</sub>): δ 10.41 (s, 1H, Isatin N-H), 8.38 (d, 1H, *J* = 4.4 Hz, Q N-H), 8.07 (dd, 1H, *J* = 8.0 Hz, Ar-H), 7.95 (dd, 1H, *J* = 8.0 Hz, Ar-H), 7.53-7.22 (m, 9H, Ar-H), 6.73-6.69 (m, 1H, Ar-H), 6.62 (t, 1H, *J* = 8.0 Hz, Ar-H), 6.56 (dd, 1H, *J* = 8.0 Hz, Ar-H), 6.48 (dd, 1H, *J* = 4.0 Hz, Ar-H), 5.44 (dd, 1H, *J* = 4.0 Hz, N-CH), 4.58 (d, 1H, *J* = 10.0 Hz, -CH), 4.08-4.02 (m, 2H, Q-CH<sub>2</sub>), 2.53-2.49 (dd, 1H, *J* = 2.0 Hz, Pyrro-N-H); <sup>13</sup>C NMR(100 MHz, DMSO-*d*<sub>6</sub>): δ 45.88, 54.12, 58.54, 62.99, 69.87, 109.33, 109.41, 113.41, 113.66, 114.70, 114.76, 114.93, 120.40, 122.29, 127.38, 128.11, 130.13, 130.20, 131.30, 131.71, 131.82, 131.95, 136.00, 136.05,



138.41, 141.97, 145.06, 156.03, 158.38, 179.93, 190.98; Anal. Calcd for C<sub>31</sub>H<sub>22</sub>ClFN<sub>4</sub>O<sub>4</sub>; C, 59.11; H, 3.52; N, 8.89; Found C, 59.46; H, 3.48; N, 8.97.

### **5-Fluro-4'-(4-fluorophenyl)-8''-nitro-5'-phenyl-1'',2''-dihydro-4''H-dispiro[indoline-3,2'-pyrrolidine-3',3''-quinoline]-2,4''-dione 6k**

Yellow solid; Yield (91%); mp: 208-218°C; IR (KBr): 3413, 3335, 1704, 1617 cm<sup>-1</sup>; <sup>1</sup>H NMR (400 MHz, DMSO-*d*<sub>6</sub>): δ 10.40 (s, 1H, Isatin N-H), 8.38(d, 1H, *J* = 5.2 Hz, Q N-H), 8.06 (dd, 1H, *J* = 6.8 Hz, Ar-H), 7.95 (dd, 1H, *J* = 6.4 Hz, Ar-H), 7.50 -7.13 (m, 9H, Ar-H), 6.74 - 6.68 (m, 1H, Ar-H), 6.62 (t, 1H, *J* = 8.0 Hz, Ar-H), 6.56 (dd, 1H, *J* = 6.0Hz, Ar-H), 6.47 (dd, 1H, *J* = 4.0 Hz, Ar-H), 5.43 (dd, 1H, *J* = 5.2 Hz, N-CH), 4.60 (d, 1H, *J* = 10.0 Hz, -CH), 4.09-3.99 (m, 2H, Q-CH<sub>2</sub>), 2.51-2.48 (d, 1H, *J* = 14.8 Pyrro-N-H) ; <sup>13</sup>C NMR(100 MHz, DMSO-*d*<sub>6</sub>): δ 45.86, 53.89, 58.47, 63.20, 69.83, 109.27, 109.34, 113.37, 113.61, 114.69, 114.86, 115.02, 115.23, 122.28, 127.29, 127.36, 128.04, 130.16, 130.24, 131.52, 131.60, 131.65, 131.78, 132.65, 132.68, 135.94, 138.38, 142.05, 145.02, 156.00, 158.35, 160.01, 162.43, 179.95; Anal. Calcd for C<sub>31</sub>H<sub>22</sub>FBrN<sub>4</sub>O<sub>4</sub>; C, 59.11; H, 3.52; N, 8.89; Found C, 59.46; H, 3.48; N, 8.97

### **5-Fluro-4'-(4-methoxyphenyl)-8''-nitro-5'-phenyl-1'',2''-dihydro-4''H-dispiro[indoline-3,2'-pyrrolidine-3',3''-quinoline]-2,4''-dione 6l**

Yellow solid; Yield (92%); mp: 210-224°C; IR (KBr): 3403, 3315, 1701, 1613 cm<sup>-1</sup>; <sup>1</sup>H NMR (400 MHz, DMSO-*d*<sub>6</sub>): δ 10.37 (s, 1H, Isatin N-H), 8.38 (d, 1H, *J* = 4.0 Hz, Q N-H), 8.06 (dd, 1H, *J* = 4.0 Hz, Ar-H), 7.93 (d, 1H, *J* = 8.0 Hz, Ar-H), 7.50-7.19 (m, 7H, Ar-H), 6.86 (d, 2H, *J* = 8.0 Hz, Ar-H), 6.71 - 6.68 (m, 1H, Ar-H), 6.62 -6.55 (m, 2H, Ar-H), 6.46 (dd, 1H, *J* = 4.0 Hz, Ar-H), 5.42 (dd, 1H, *J* = 8.0 Hz, N-CH), 4.56 (d, 1H, *J* = 10.0 Hz, -CH), 4.12-4.06 (m, 2H, Q-CH<sub>2</sub>), 3.71 (s, 3H, -OCH<sub>3</sub>), 2.51 (d, 1H, Pyrro-N-H) ; <sup>13</sup>C NMR (100 MHz, DMSO-*d*<sub>6</sub>): δ 45.93, 53.89, 54.90, 58.63, 63.00, 69.75, 109.24, 113.01, 113.79, 122.35, 127.20, 127.45, 128.01, 128.22, 130.68, 131.64, 131.79, 135.96, 142.33, 145.05, 156.05, 158.24, 180.08, 191.23; HRMS *m/z* (M+H) 564.1899; Anal. Calcd for C<sub>32</sub>H<sub>25</sub>FN<sub>4</sub>O<sub>4</sub>; C, 59.11; H, 3.52; N, 8.89; Found C, 59.46; H, 3.48; N, 8.97

## **2.2 Biology**

**2.2.1 MTT Cytotoxicity Assay:** Cell survival was measured by the MTT (3-(4,5-dimethylthiazol-2-yl)-2,5-diphenyltetrazolium bromide) assay as previously described. Briefly, cells were seeded in 100 mL of growth medium at a density of 4000 cells/well in 96-well plates and allowed to establish for 24 h, at which time serially diluted compounds were added in an additional 100 mL of growth medium. Cells were then incubated for 72 h at 37°C in humidified 5% CO<sub>2</sub>, at which time the growth media was drawn and replaced with MTT in IMDM growth media and incubated for 4 h. The MTT solution was then aspirated from the wells, 100 mL of acidified ethanol solution was added to each well, and after following a 15 min lysis step, cell viability was measured spectro photometrically by absorbance at 570 nm and background corrected at 690 nm. All MTT assays were performed three times in triplicate. IC<sub>50</sub> cytotoxicity

values were determined as the drug concentration that reduced the absorbance to 50% of that in untreated control wells and derived from at least three separate experiments.

**2.2.2 Cell Culture and Compounds Treatment:** HeLa cells (human cervical carcinoma cells) was procured from National Center for Cell Sciences (NCCS), Pune, India and were cultured in Dulbecco's modified Eagle's medium supplemented with L-glutamine (4 mM), penicillin (50 units mL<sup>-1</sup>), streptomycin (50 mg mL<sup>-1</sup>), and 10% (v/v) fetal bovine serum. Cells were maintained in 5% CO<sub>2</sub> humidified incubator at 37°C. The stock solutions of compounds and were prepared in sterile phosphate buffered saline (PBS). Required volumes of IC<sub>50</sub> compounds were added to the cultures to obtain appropriate concentrations incubated for 24 h. DMEM was used to dilute the stock to required concentrations. After the treatment with compounds, cells were observed under a phase contrast microscope (Nikon ECLIPSE, TS100, Tokyo) to identify the morphological changes as compared to the non-treated cells.

**2.2.3 Hemolysis Assay:** Hemolysis assay was performed as per the guidelines of research ethics and Bharathiar University, Department of Chemistry approved these human blood samples analysis. Informed consent was obtained from the human subject for analyzing the human blood samples. Fresh blood sample was obtained and diluted using physiological saline. Red blood cells (RBCs) were then isolated from the serum by centrifugation at 3000 rpm for 10 min. After careful washing three times, a suspension of RBCs was added into the compounds solution at systematically varied IC<sub>50</sub> concentrations and mixed completely. The mixture was incubated in a 5% CO<sub>2</sub> atmosphere at 37°C. After incubation, all suspensions were centrifuged at 3000 rpm for 5 min, and then photos were taken for each sample. The supernatant of each tube was transferred to a 96-well plate. The OD values of supernatants were measured with a microplate reader at 570 nm. The precipitation of each tube was used to make the cell smear to observe the morphological changes of the erythrocyte. The hemolysis ratio of RBCs was calculated using the following formula: Hemolysis (%) = (OD sample-OD negative control)/(OD positive control-OD negative control) x 100. Physiological saline (PBS) and distilled water were used as the negative and positive controls, respectively.

**2.2.4 Determination of Intracellular ROS Generation:** The generation of ROS in compounds at IC<sub>50</sub> treated cells was determined by 2,7-dichlorofluorescein diacetate (DCFH-DA; Sigma-Aldrich, USA) staining. DCFH-DA is non-fluorescent and can diffuse into the cell through the plasma membrane where it is hydrolyzed to DCFH. Non-fluorescent DCFH is finally converted to green fluorescent dichlorofluorescein (DCF) upon intracellular oxidation. For this assay, Cells were seeded in a 6-well plate (2x10<sup>5</sup> cells/well) and were grown for 24 h. After 24 h of growth, the cells were treated with IC<sub>50</sub> concentrations of compounds for 3 h, harvested, and washed twice with PBS. Finally, the cells were resuspended in 1 mL of DMEM with 5 µM DCFH-DA and incubated for 10 min at 37°C. Stock (1 mM) solution of DCFH-DA was prepared in ethanol and stored under liquid nitrogen vapor. Immediately after the incubation, the samples were analyzed for DCF fluorescence in a flow cytometer (FacsCalibur, BD Biosciences, NJ) at an excitation wavelength of 485 nm and emission wavelengths of 530. The fluorescence data were recorded with the Cell Quest program (BD Biosciences) for 20000 cells in each sample. Flow

cytometric data were analyzed using WinMDI software and the ROS generation was expressed in terms of percentage of cells with DCF (green) fluorescence. A parallel batch of treated cells was stained with DCFH-DA visualized under a fluorescence microscope (Nikon ECLIPSE, TS100, Tokyo).

**2.2.5 DAPI Staining:** The Cells ( $1 \times 10^5$  cells/coverlip) were incubated with compounds at their  $IC_{50}$  concentration, fixed in methanol:acetic acid (3:1 v/v) and stained with 5  $\mu\text{g}/\text{mL}$  of DAPI for 20 min, and analysed for nuclear morphological changes using fluorescence microscope with excitation filter at 510-590 nm.

### 2.2.6. Flow cytometry and Western blot analysis

The flow cytometric detection of apoptosis in cancer cells, the cells were stained with Annexin V- FITC and propidium iodide (PI). In brief, the cells were pretreated with effective compound concentration. The treated cells were suspended in 200  $\mu\text{L}$  of binding buffer, and the suspension was added with 10  $\mu\text{L}$  of Annexin V-FITC and 5  $\mu\text{L}$  of PI followed by incubation for 15 min in dark at room temperature. Subsequently, 300  $\mu\text{L}$  of binding buffer was added to the cell suspension and the cells were analyzed by a flow cytometer (BD, FACS Calibur, USA). Cells undergoing early apoptosis bind only to Annexin V/FITC, while cells that are either in the late stages of apoptosis or already dead bind to both Annexin V/FITC and PI. All experiments detected at least 10,000 cells, and the data were analyzed with FCS Express V3.

Western blotting of the cells was treated with effective compound for the induction of apoptosis. Western blot analysis for expression of the caspase were incubated for 1h in 5% powdered non-fat milk in PBS (pH 7.4) with antibodies for 30 min in 5% non-fat dry milk with goat anti-mouse serum (1:2000) and visualized. Subsequently, Western blot analysis was performed for cell extracts after determining their protein content by Bradford assay. 50  $\mu\text{g}$  protein samples were resolved by 12% SDS-polyacrylamide gel electrophoresis and then transferred to nitrocellulose membrane (Pall Corporation, USA). The membranes were immersed in blocking buffer (5% skim milk in PBS) for 1 h at room temperature and incubated overnight with primary antibodies. After normalization with the corresponding expression of  $\beta$ -actin, the protein expression was determined.

**2.2.6 Statistical Analysis:** Statistical analysis was performed with the Statistical Program for Social Sciences software (SPSS). All data were expressed as means  $\pm$  standard deviation, and a statistically significant difference was considered to be present at  $*p < 0.05$  as significant or  $**p < 0.01$  as highly significant. All assays were carried out in triplicates with three independent experiments.

## Spectral data

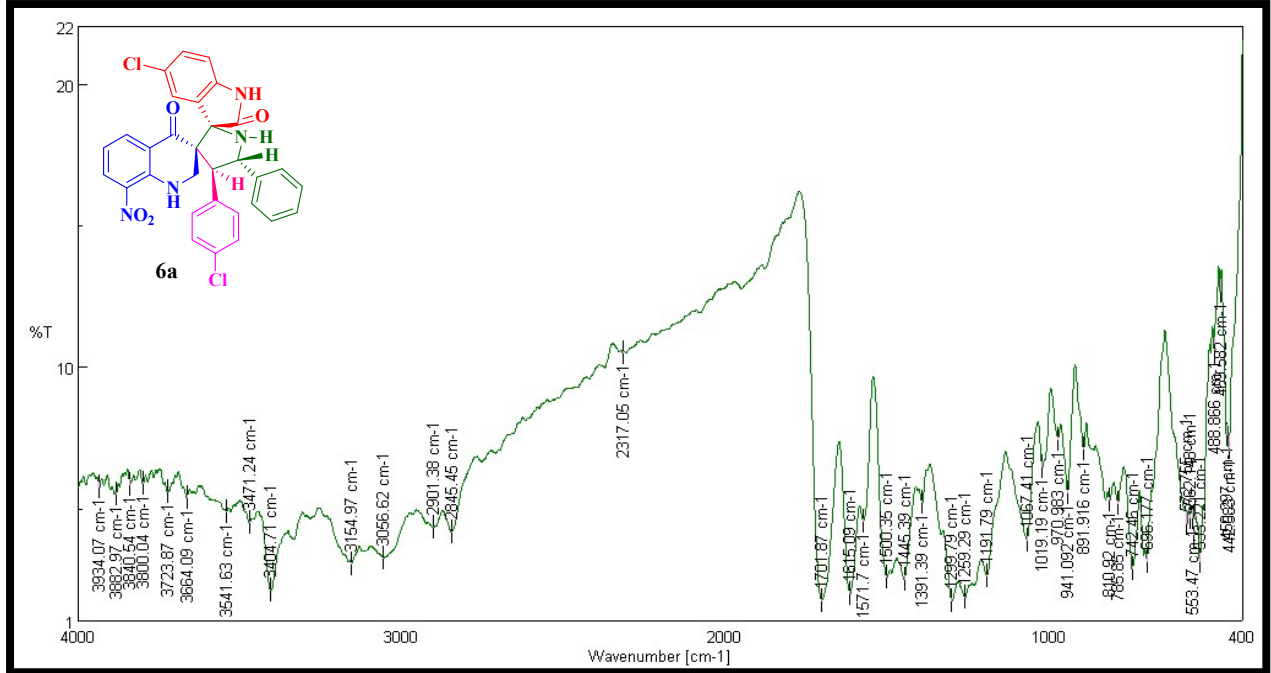

Fig. S1. IR spectrum of compound 6a

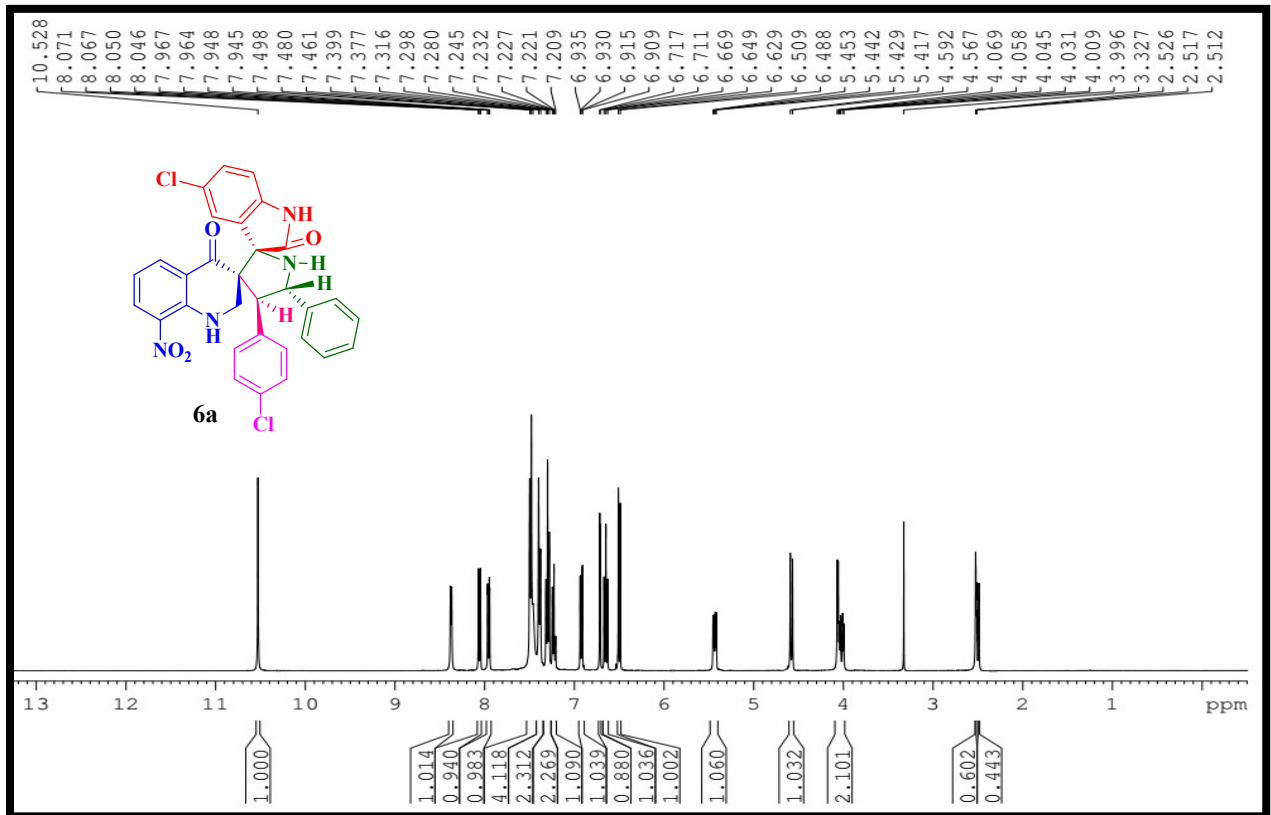

Fig. S2. <sup>1</sup>H NMR spectrum of compound 6a

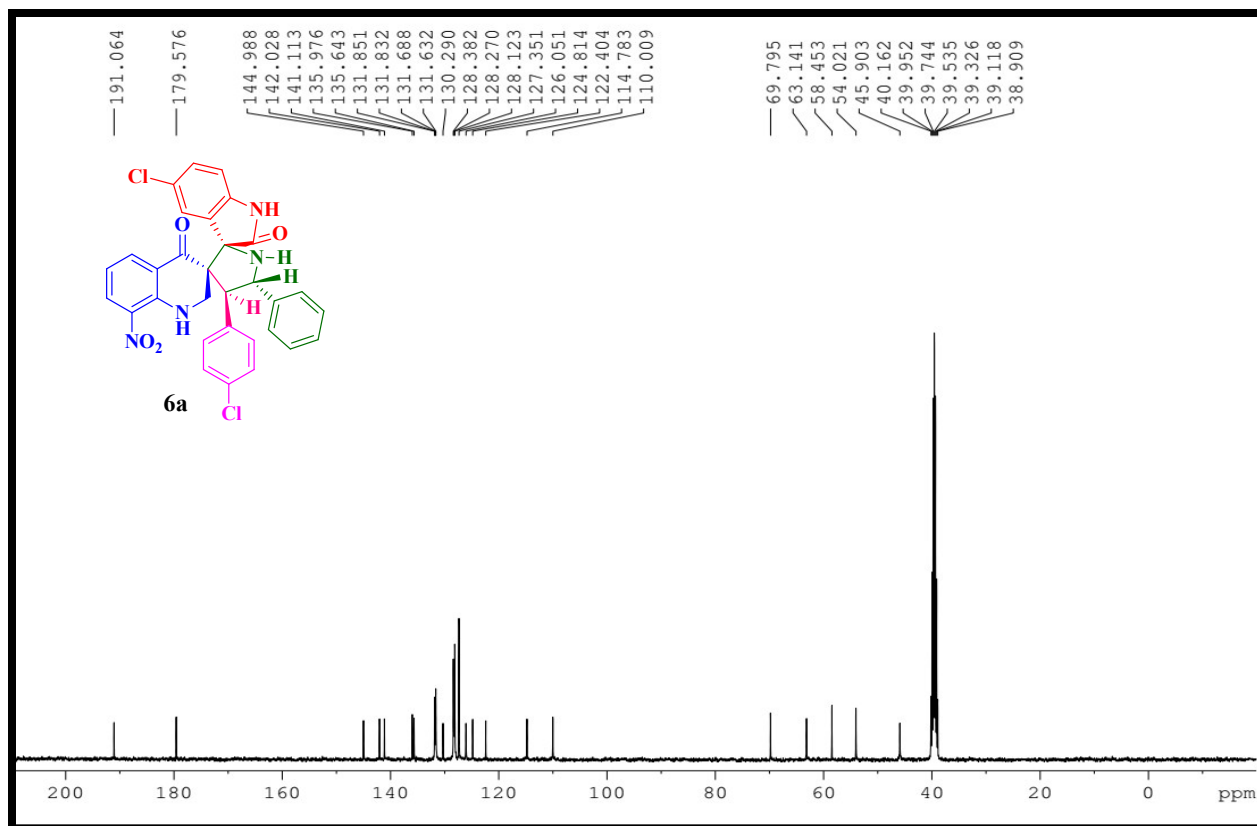

Fig. S3. <sup>13</sup>C NMR spectrum of compound 6a

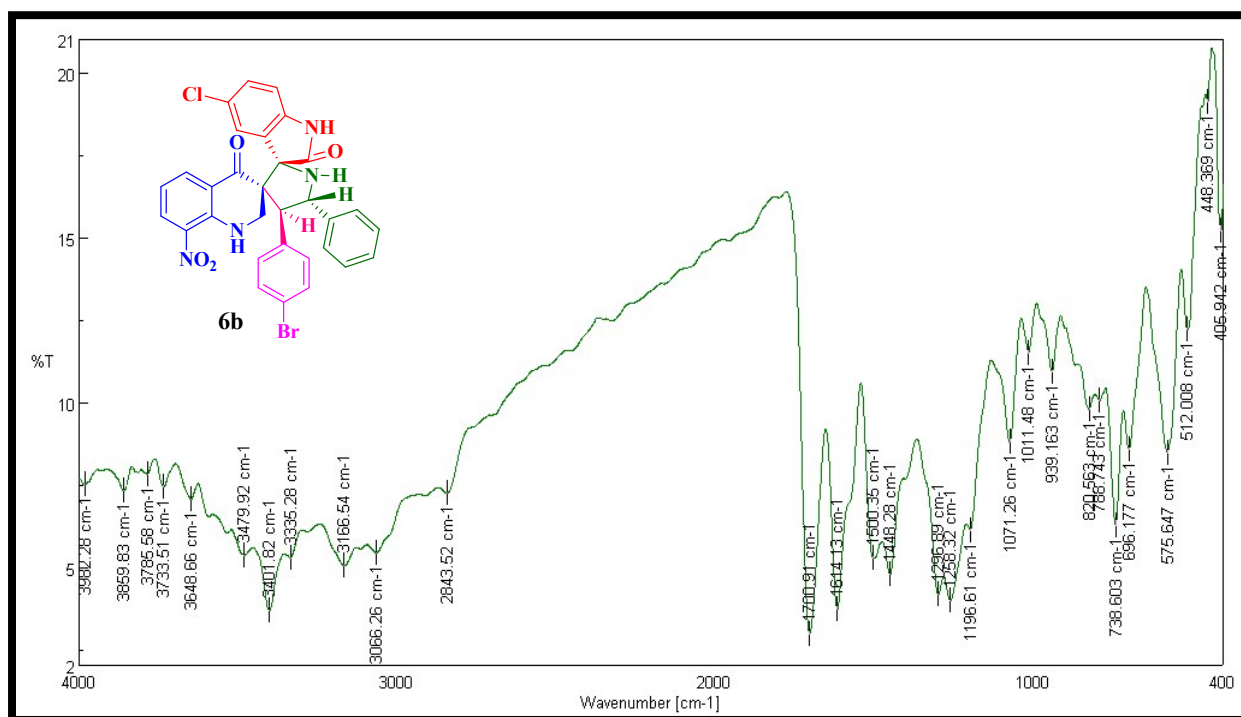

Fig. S4. IR spectrum of compound 6b

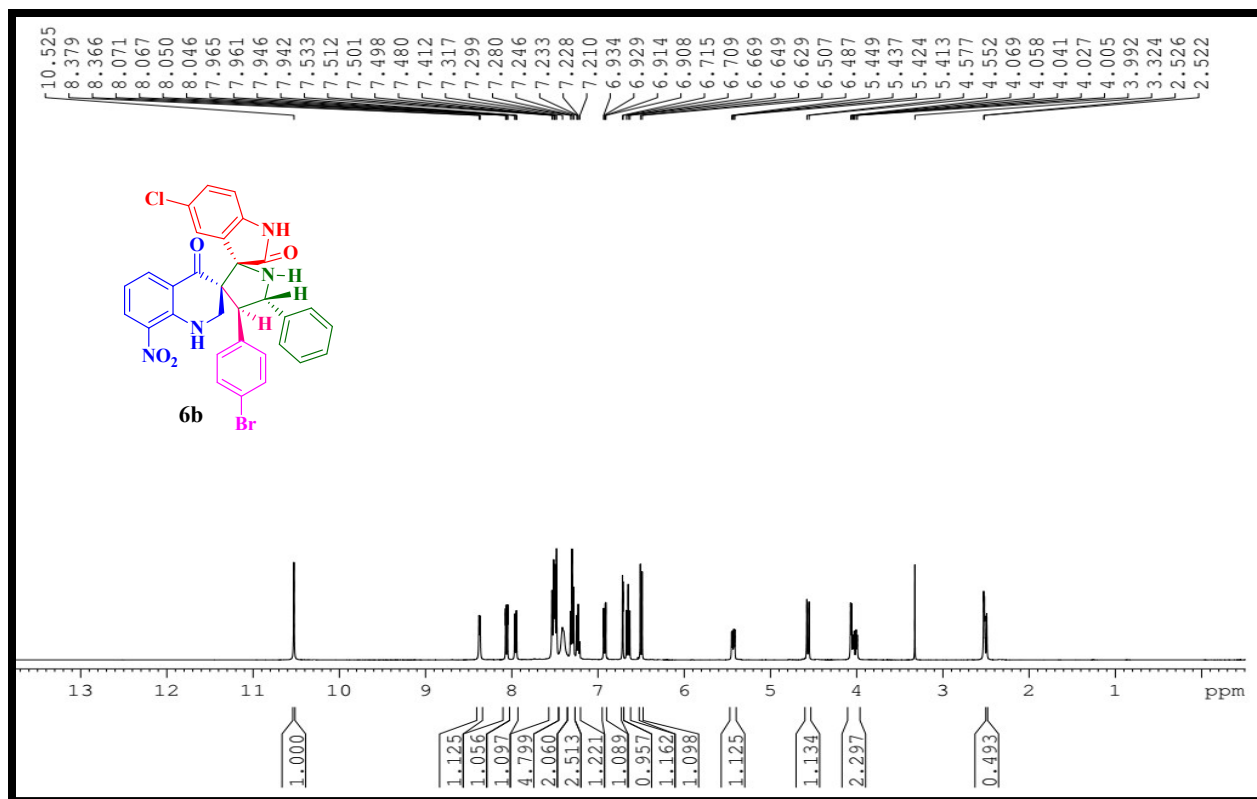

Fig. S5. <sup>1</sup>H NMR spectrum of compound 6b

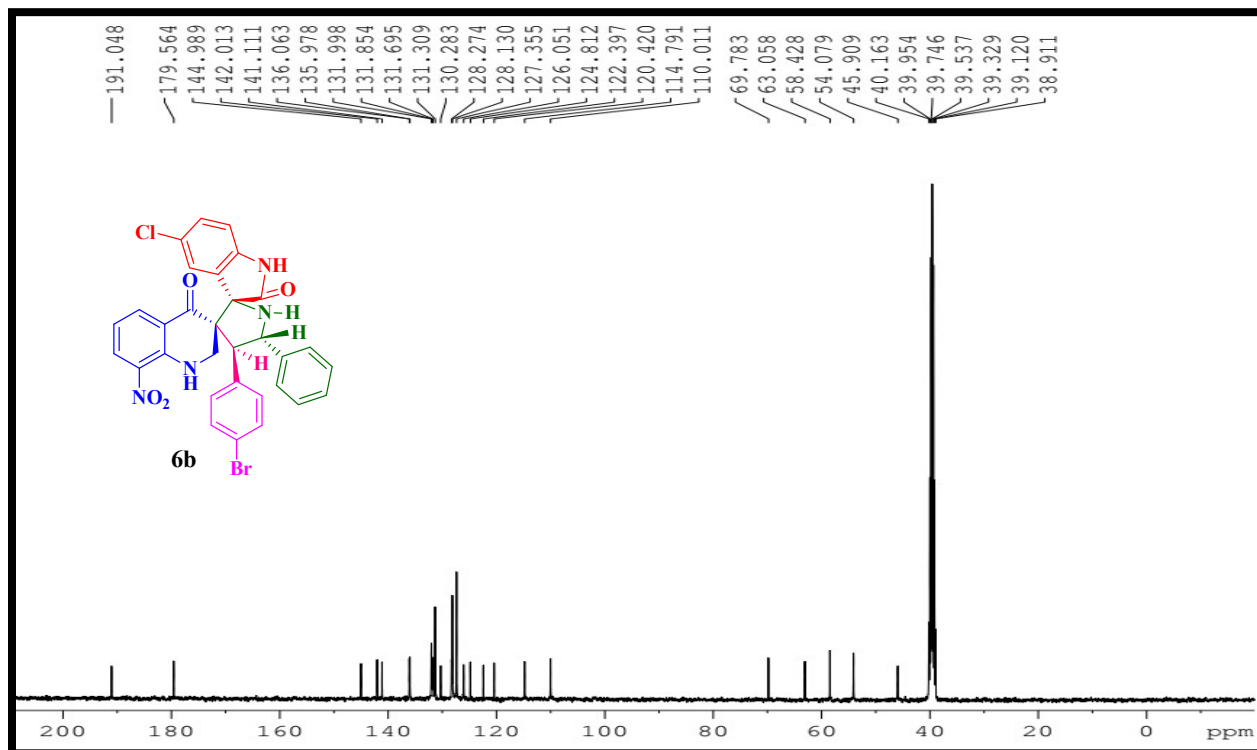

Fig. S6. <sup>13</sup>C NMR spectrum of compound 6b

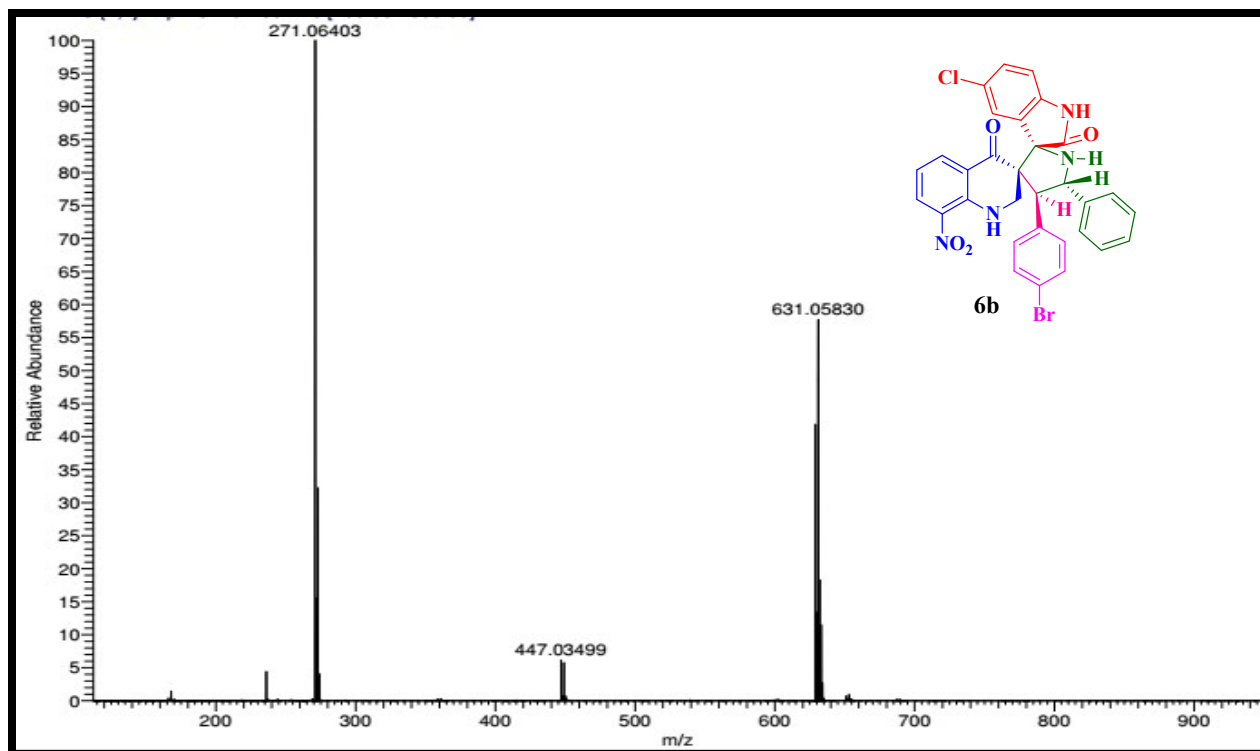

Fig. S7. HRMS spectrum of compound 6b

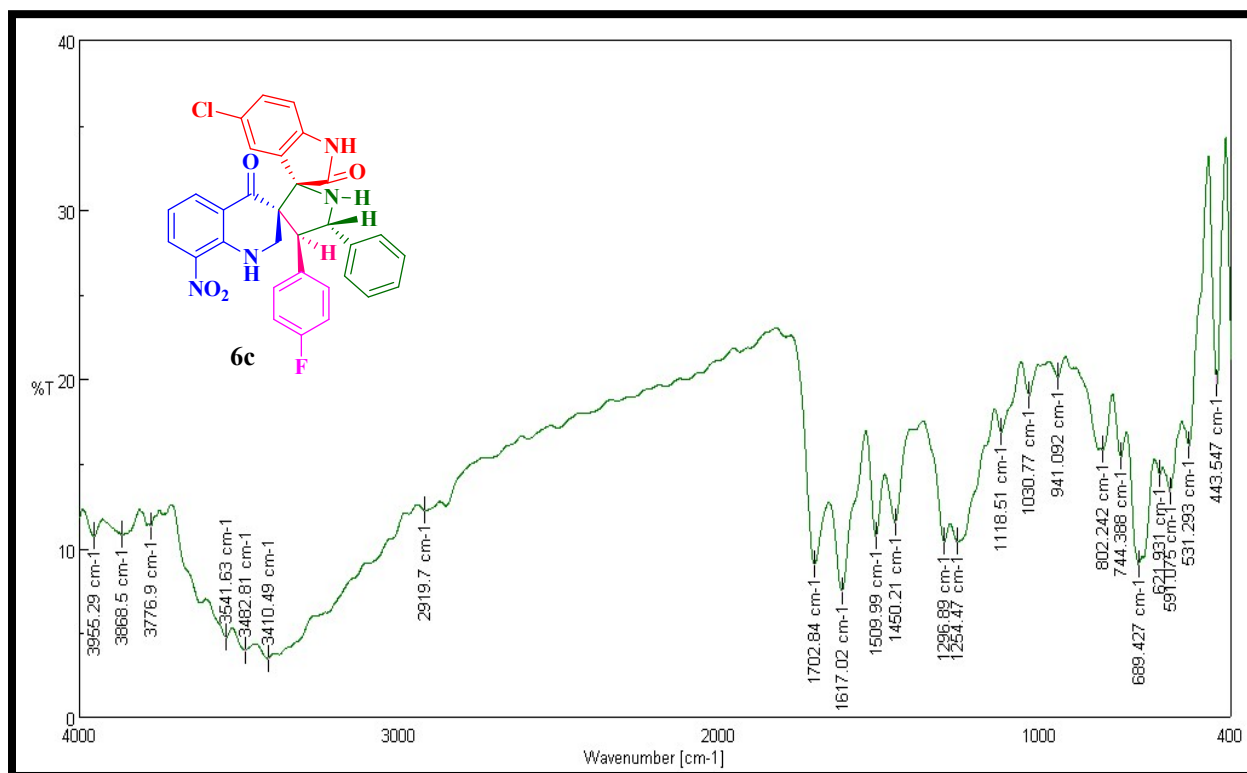

Fig. S8. IR spectrum of compound 6c

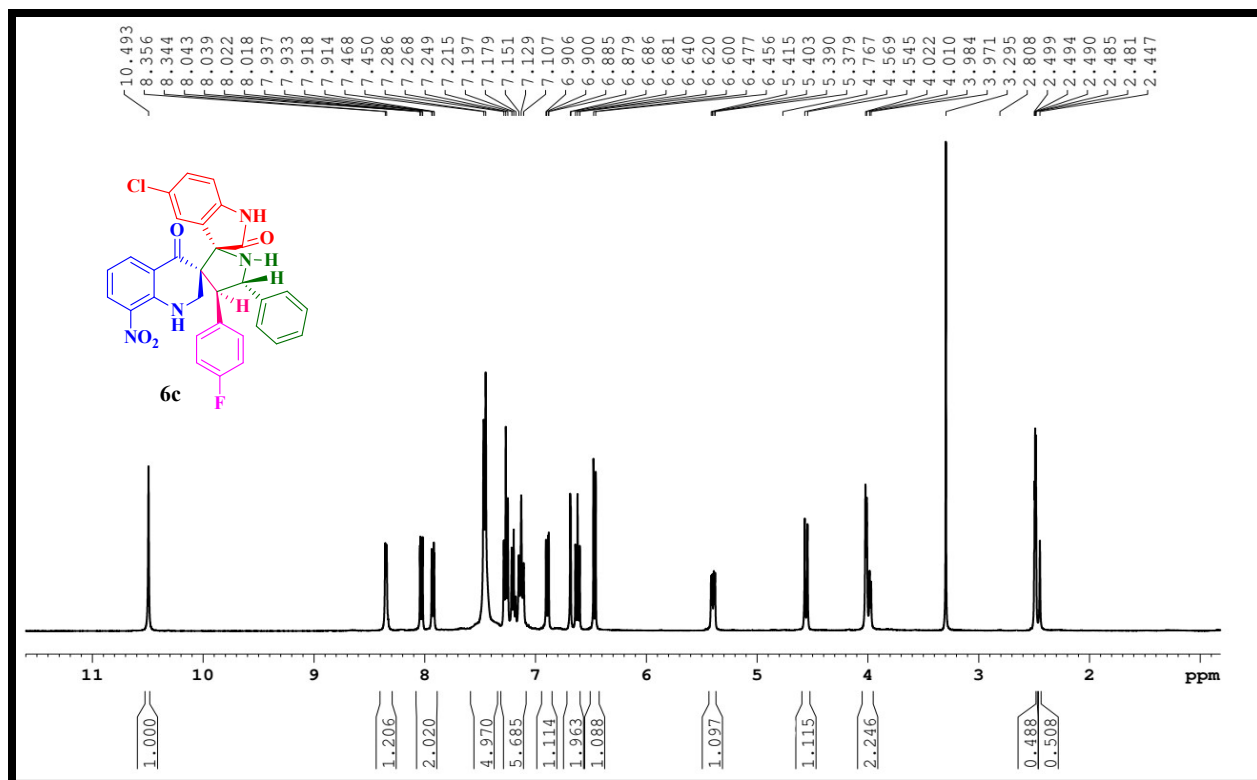

Fig. S9. <sup>1</sup>H NMR spectrum of compound 6c

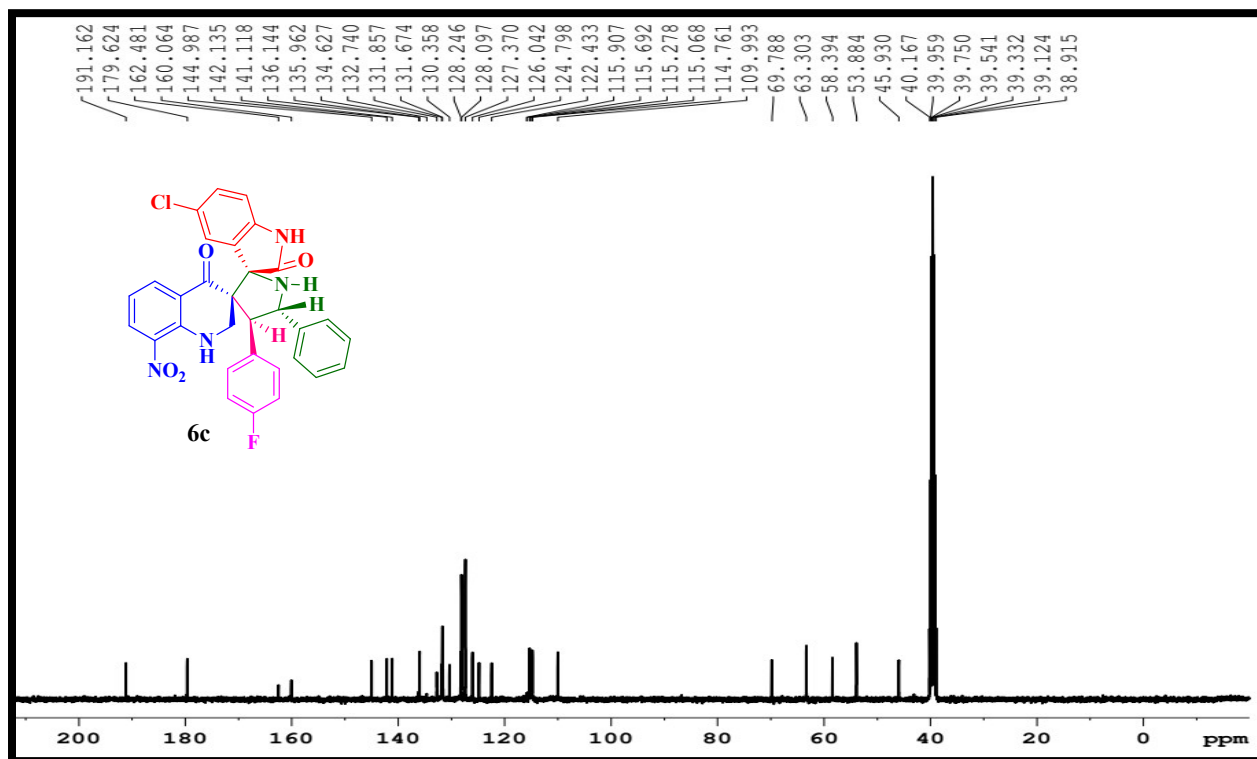

Fig. S10. <sup>13</sup>C NMR spectrum of compound 6c



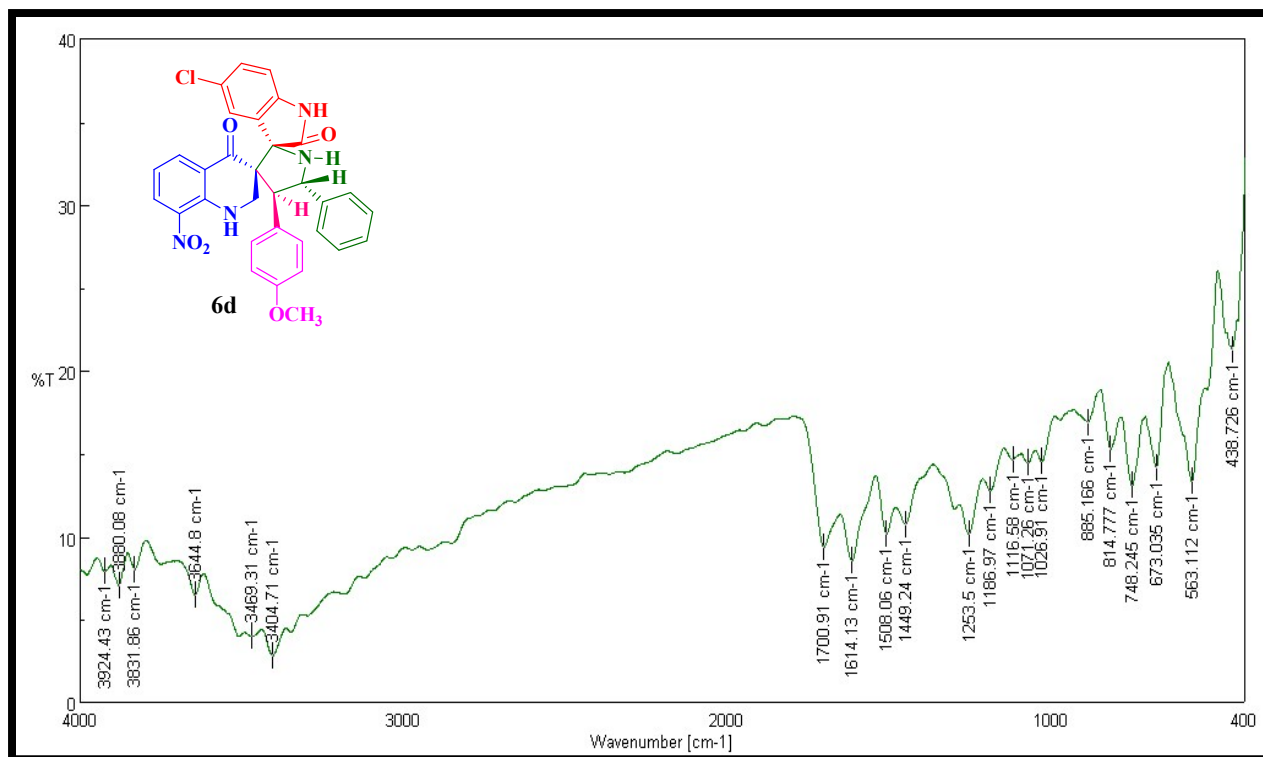

Fig. S11. IR spectrum of compound 6d

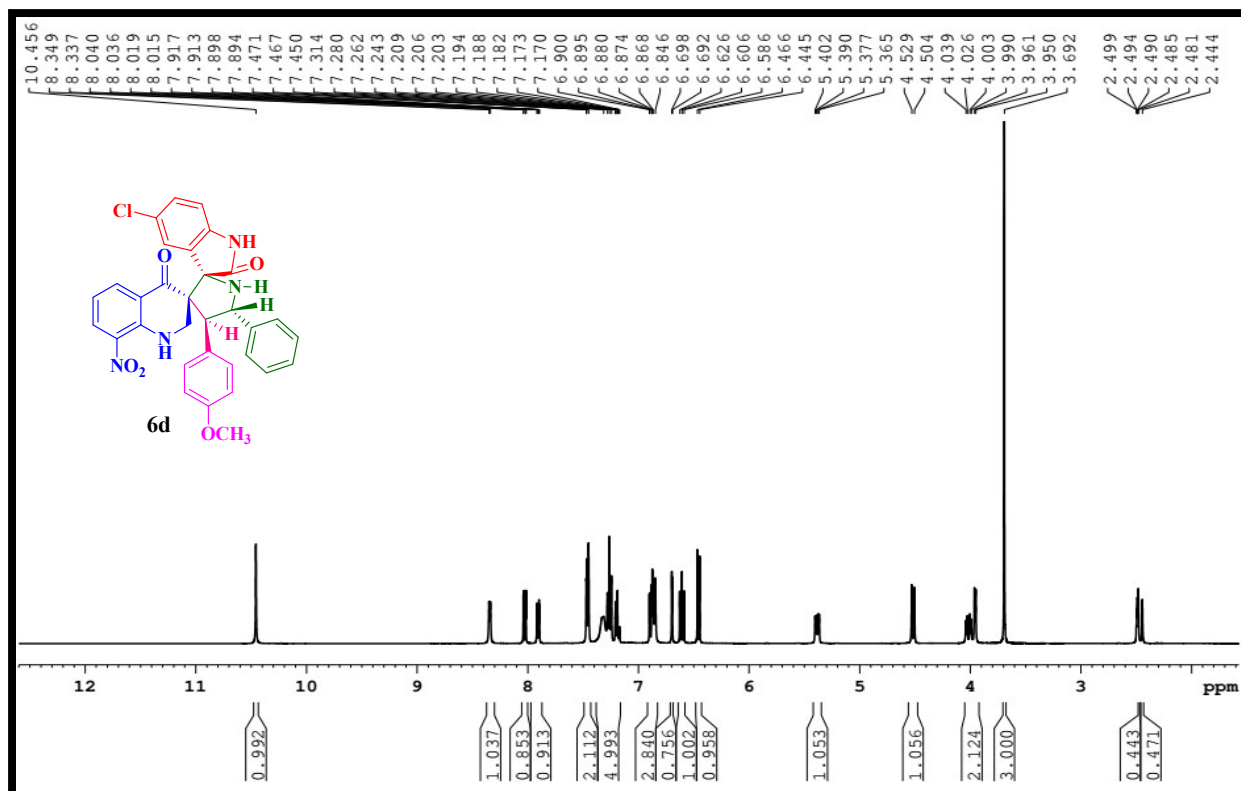

Fig. S12. <sup>1</sup>H NMR spectrum of compound 6d

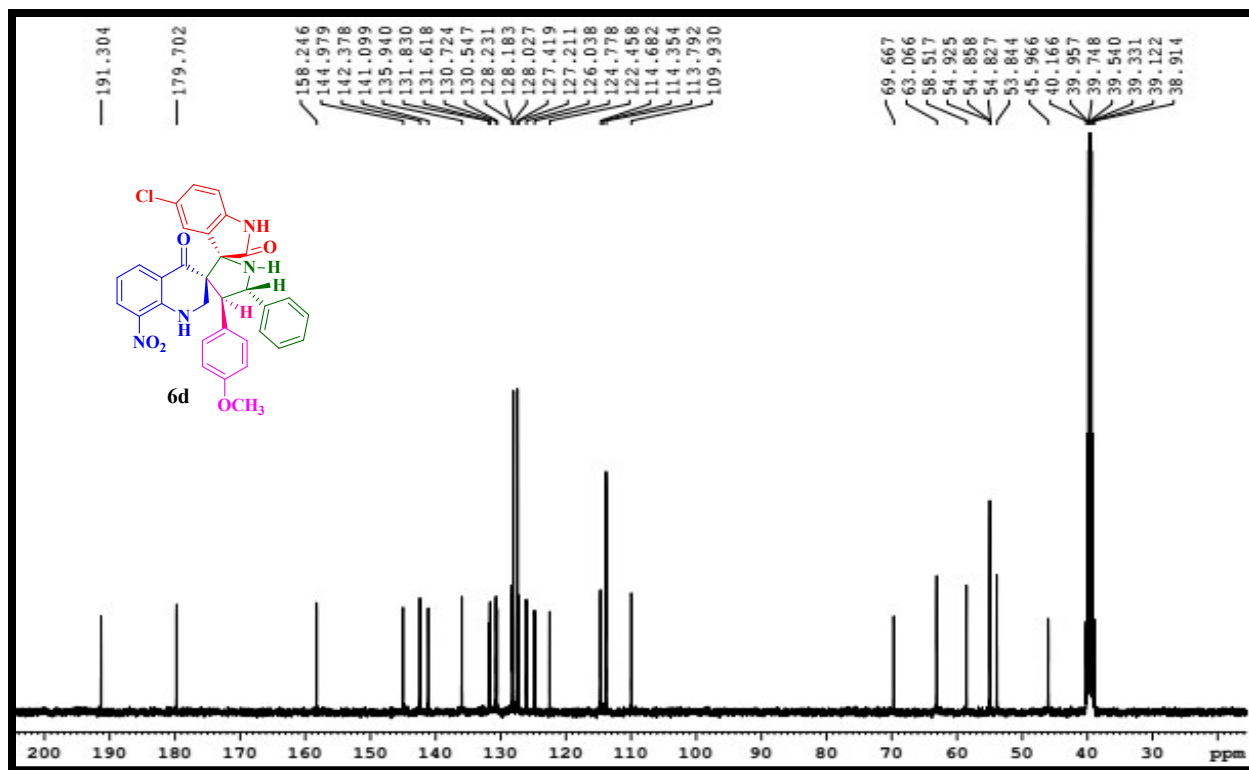

Fig. S13. <sup>13</sup>C NMR spectrum of compound 6d

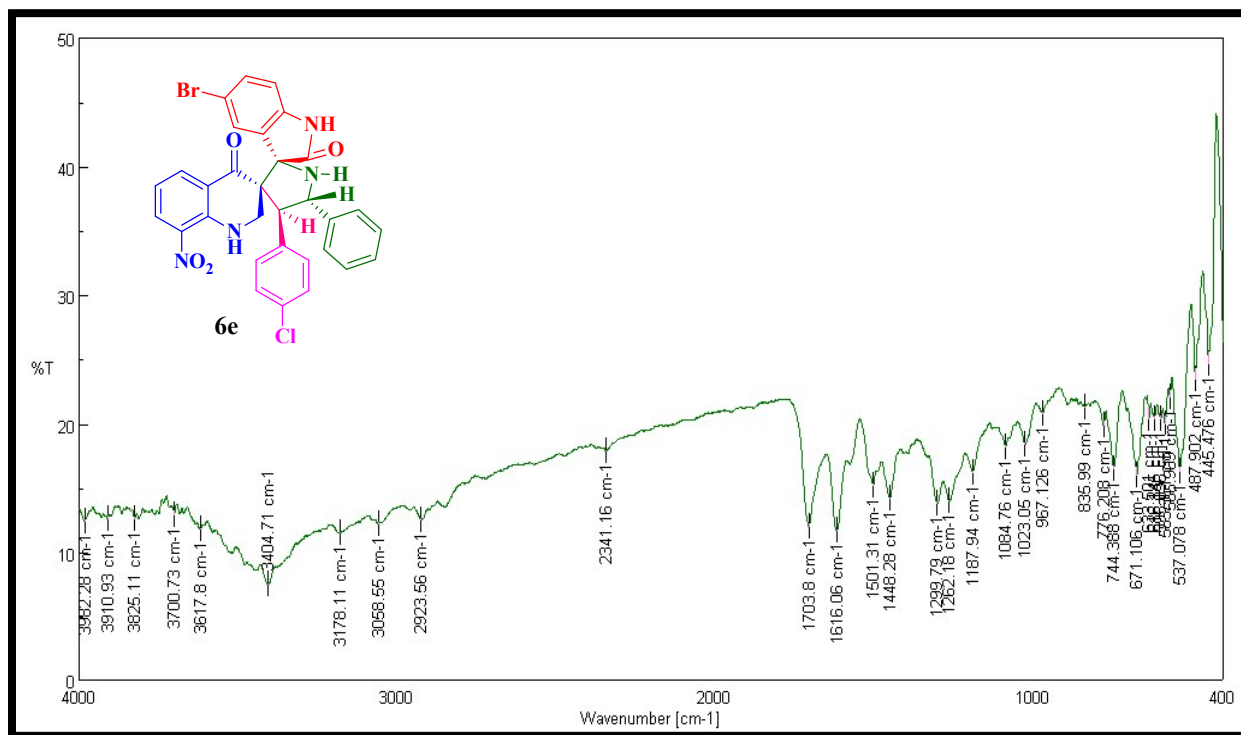

Fig. S14. IR spectrum of compound 6e

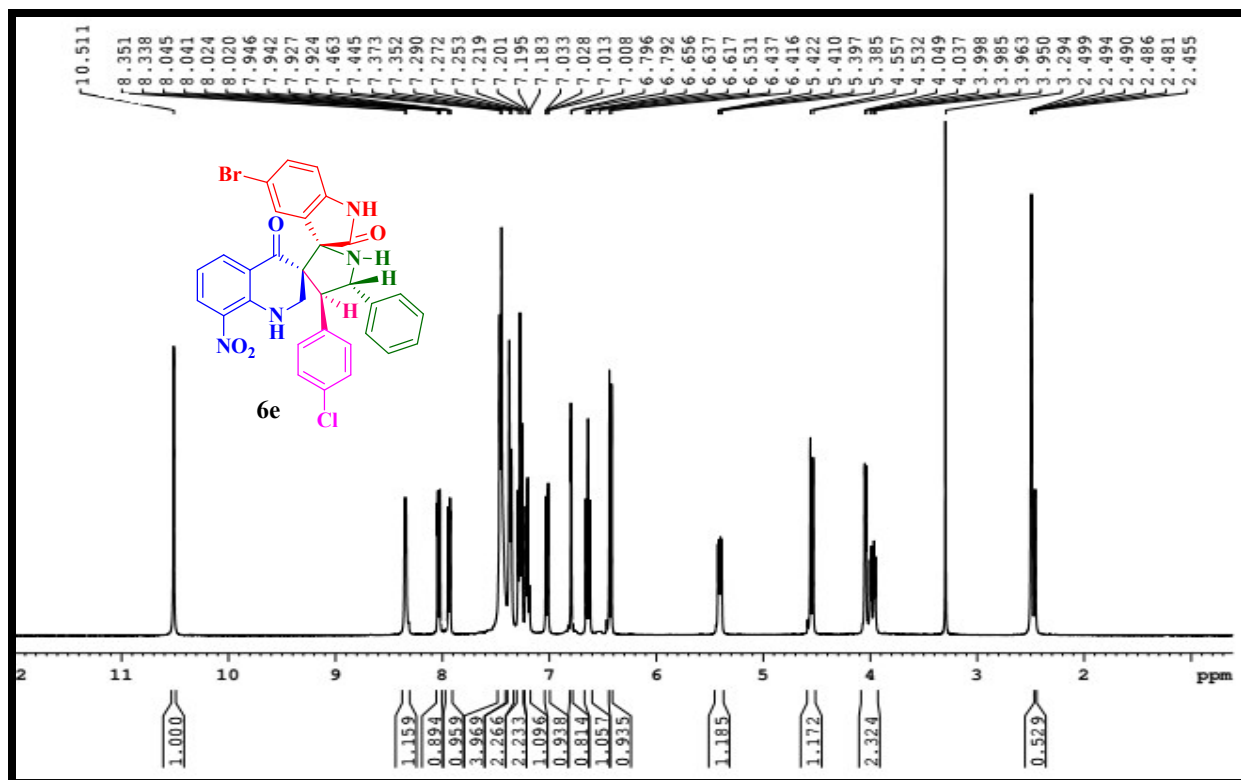

S15. <sup>1</sup>H NMR spectrum of compound 6e

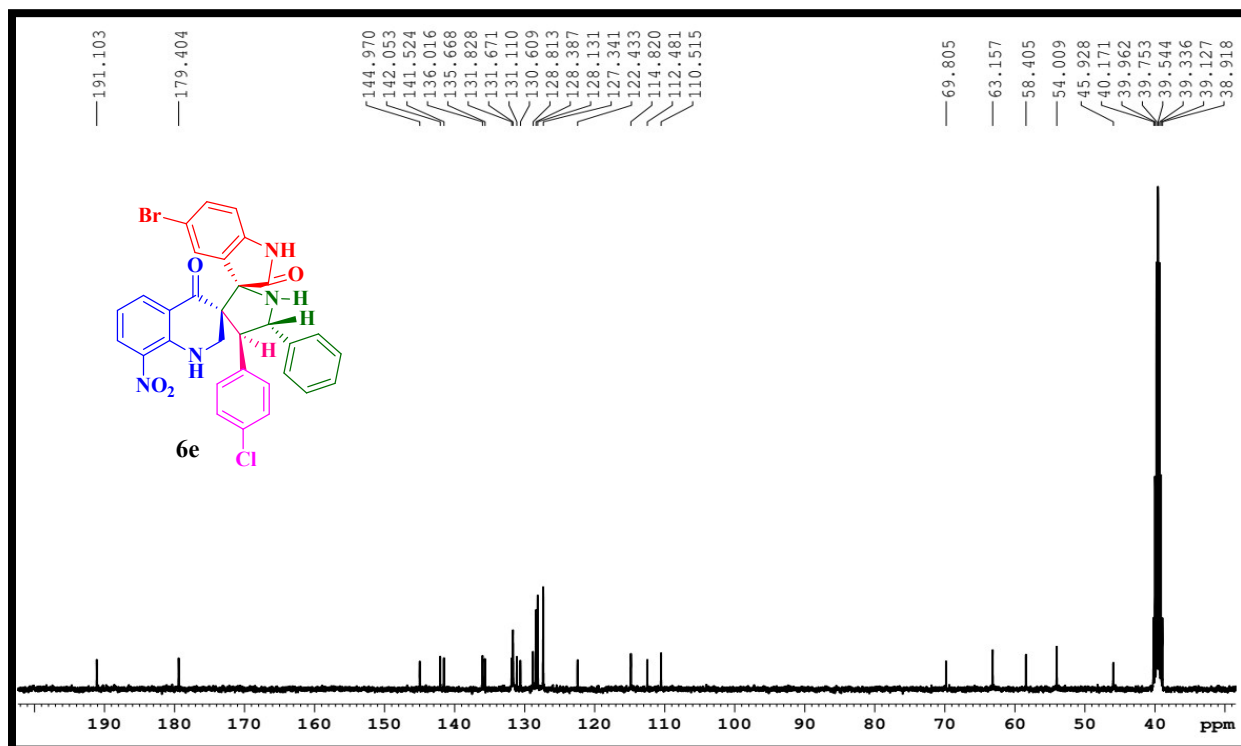

S16. <sup>13</sup>C NMR spectrum of compound 6e

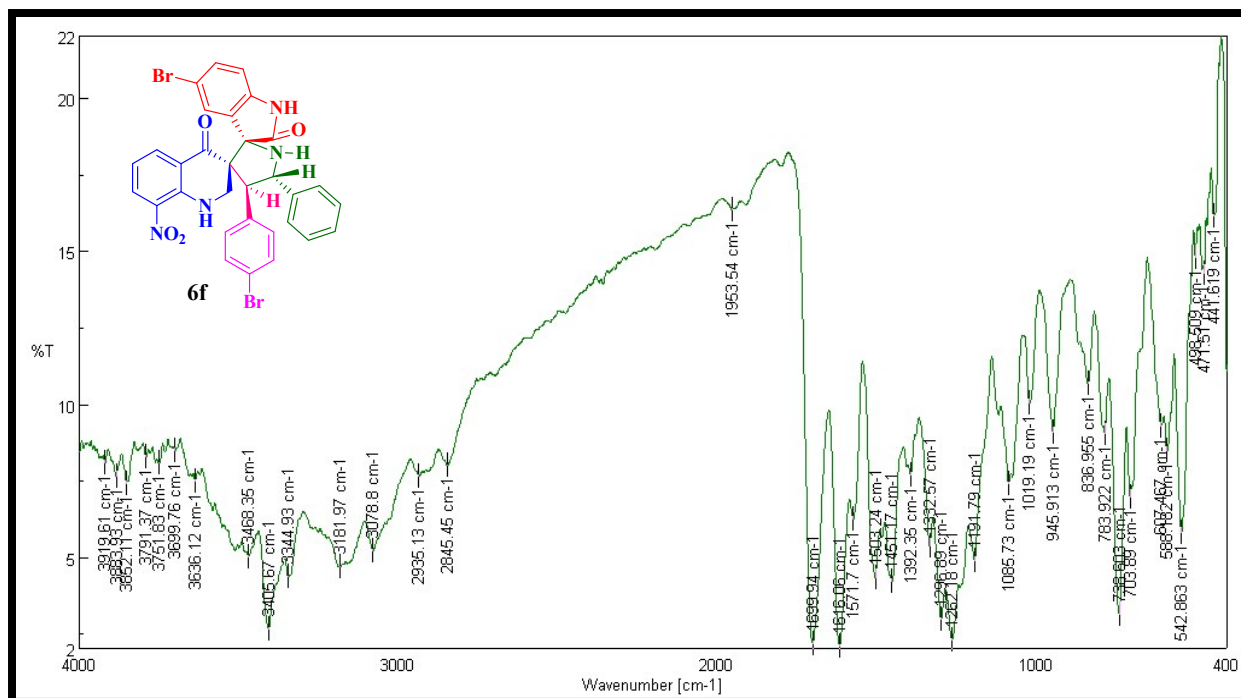

Fig. S17. IR spectrum of compound 6f

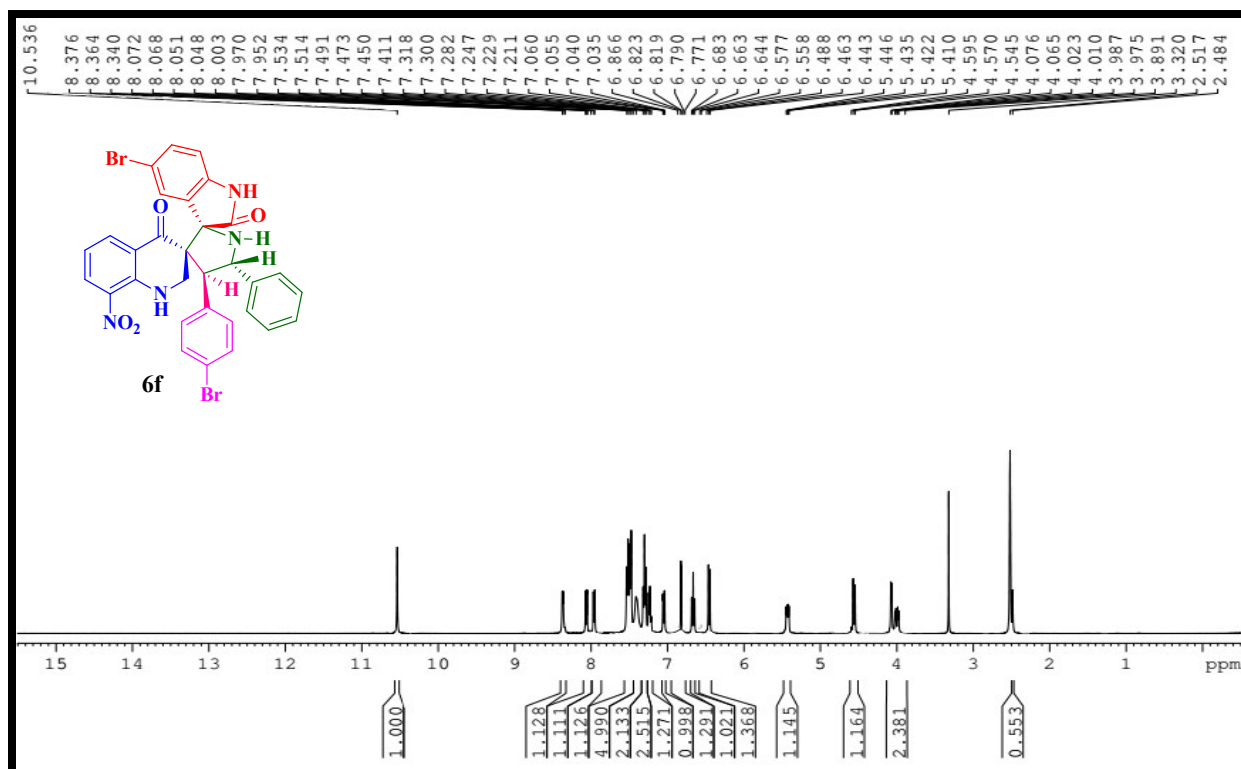

S18. <sup>1</sup>H NMR spectrum of compound 6f

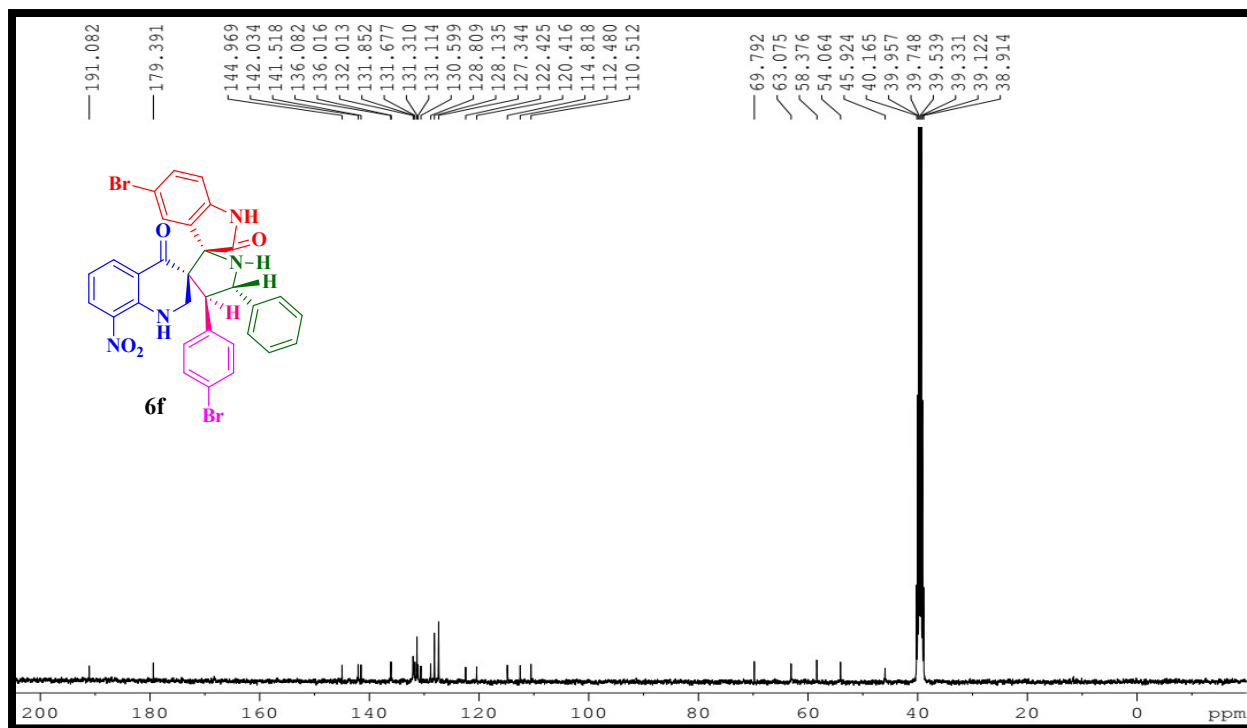

**S19. <sup>13</sup>C NMR spectrum of compound 6f**

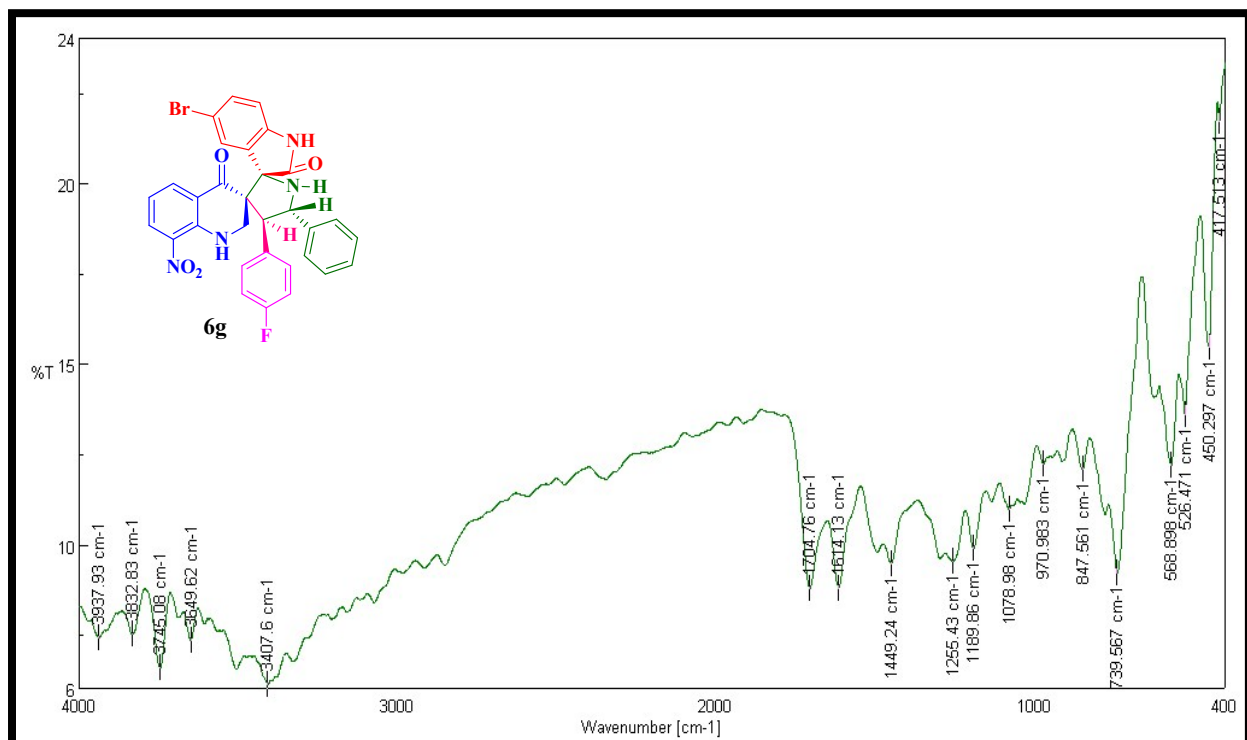

**Fig. S20. IR spectrum of compound 6g**

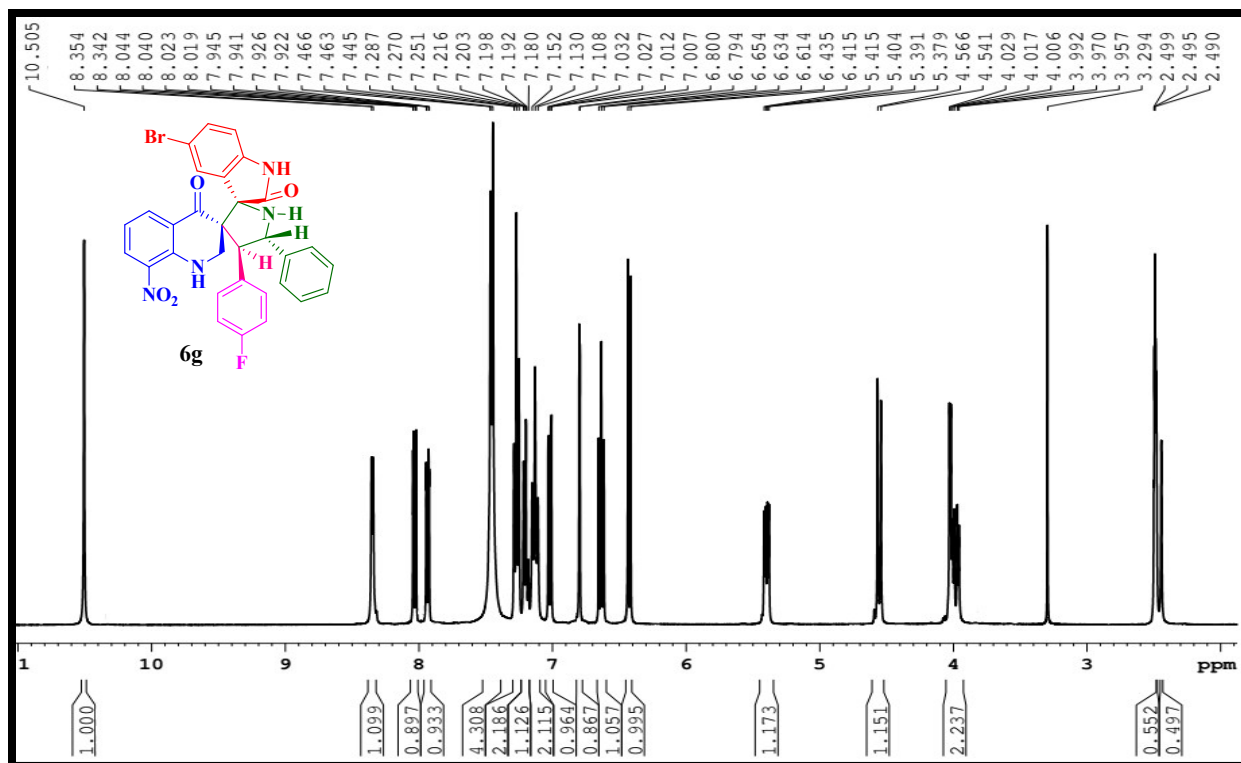

Fig. S21. <sup>1</sup>H NMR spectrum of compound 6g

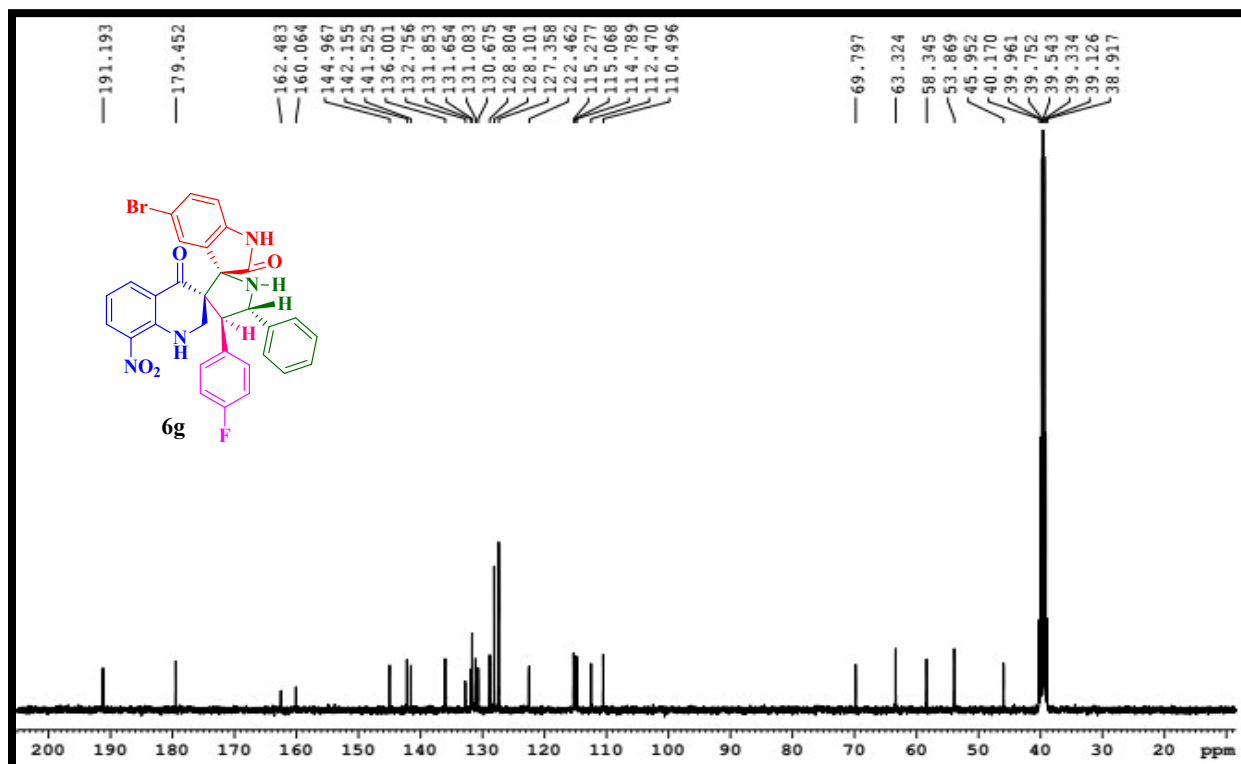

Fig. S22. <sup>13</sup>C NMR spectrum of compound 6g

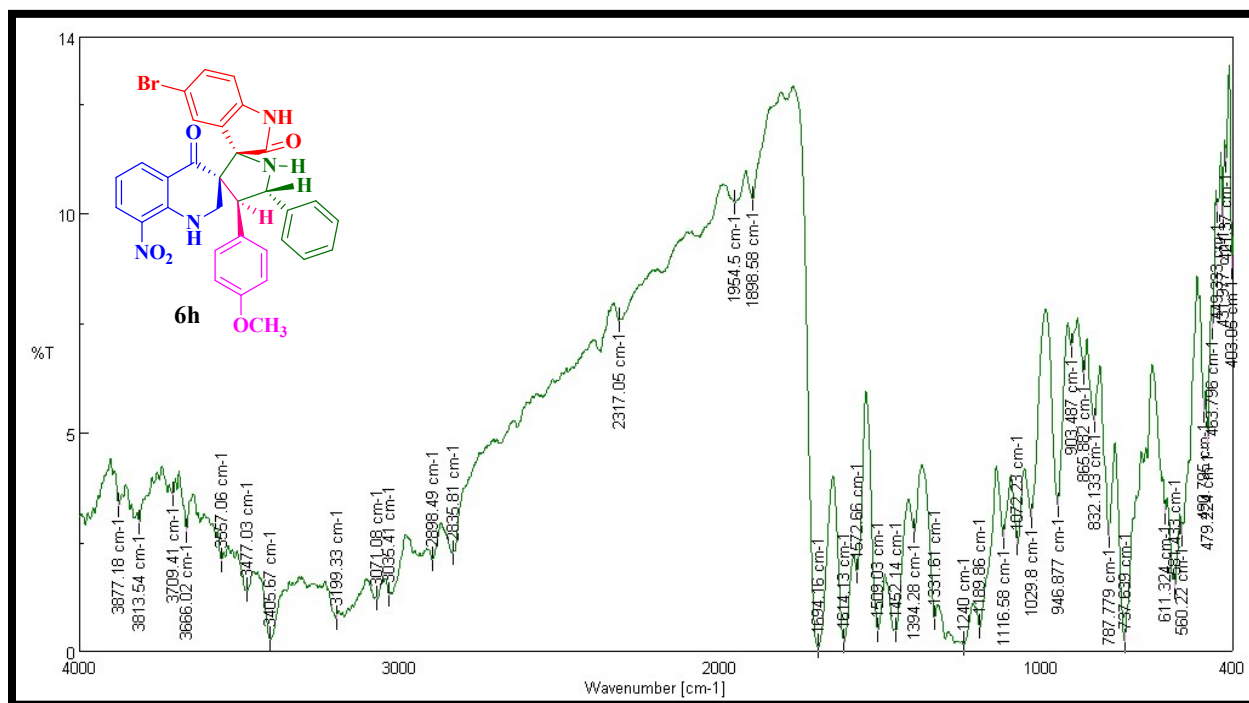

Fig. S23. IR spectrum of compound 6h

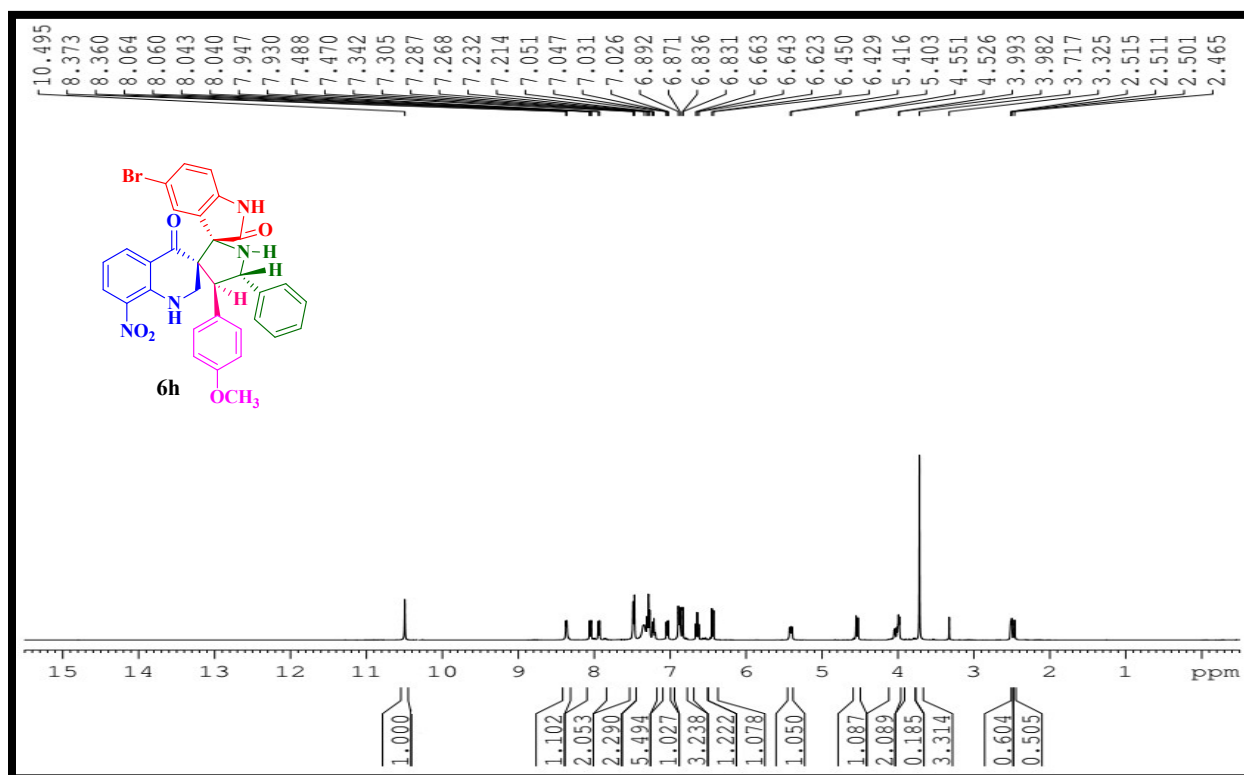

Fig. S24. <sup>1</sup>H NMR spectrum of compound 6h

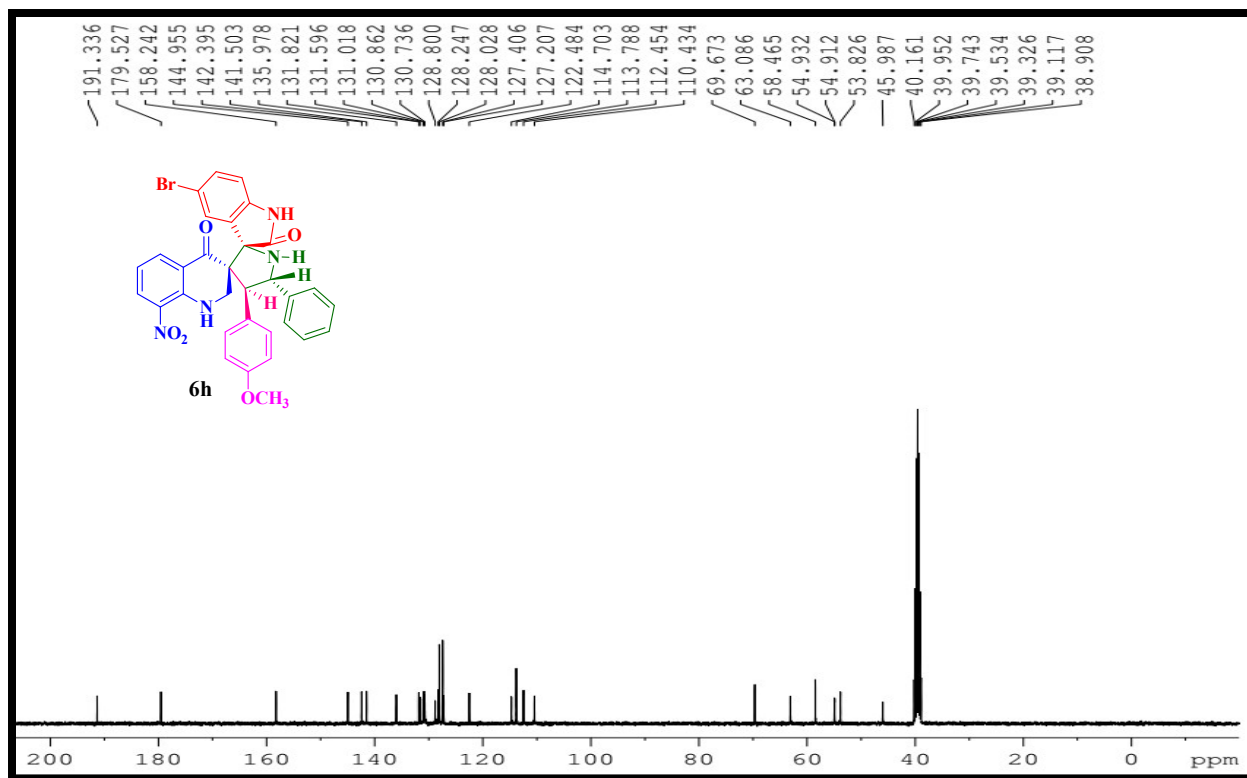

Fig. S25.  $^{13}\text{C}$  NMR spectrum of compound 6h

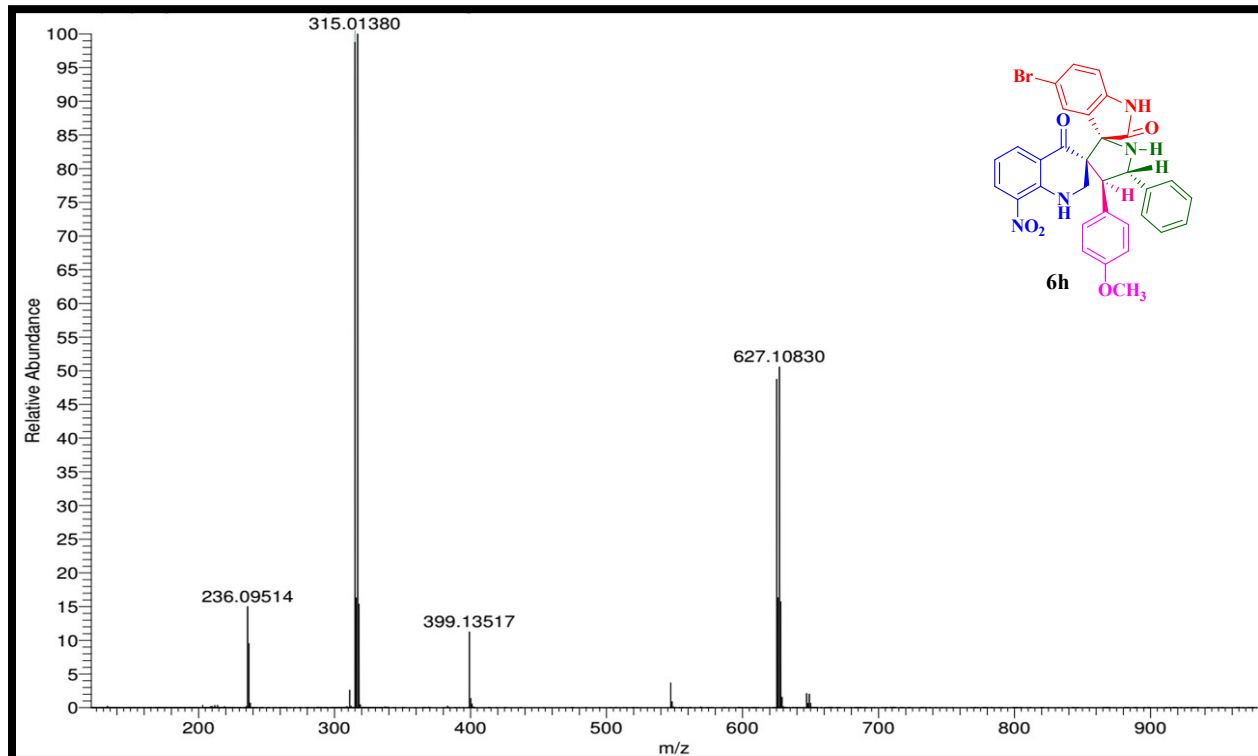

Fig. S26. HRMS NMR spectrum of compound 6h



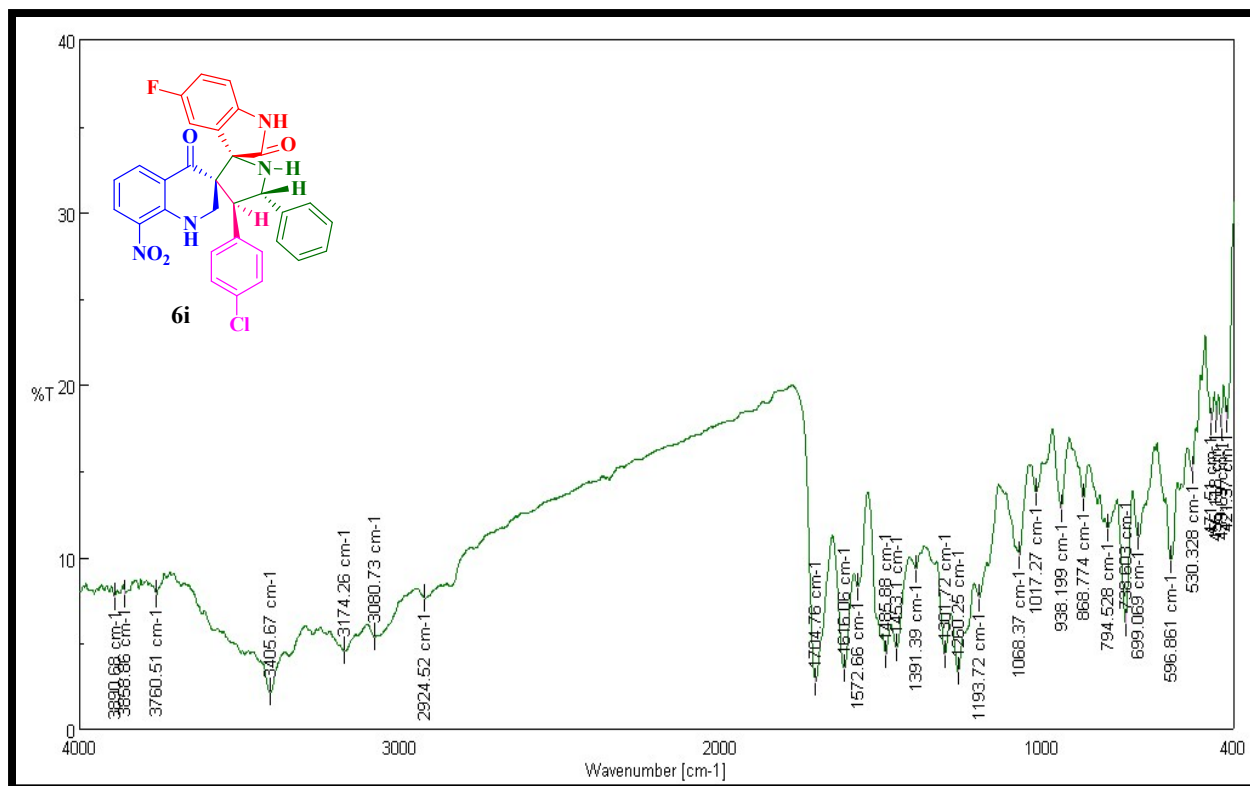

Fig. S27. IR spectrum of compound 6i

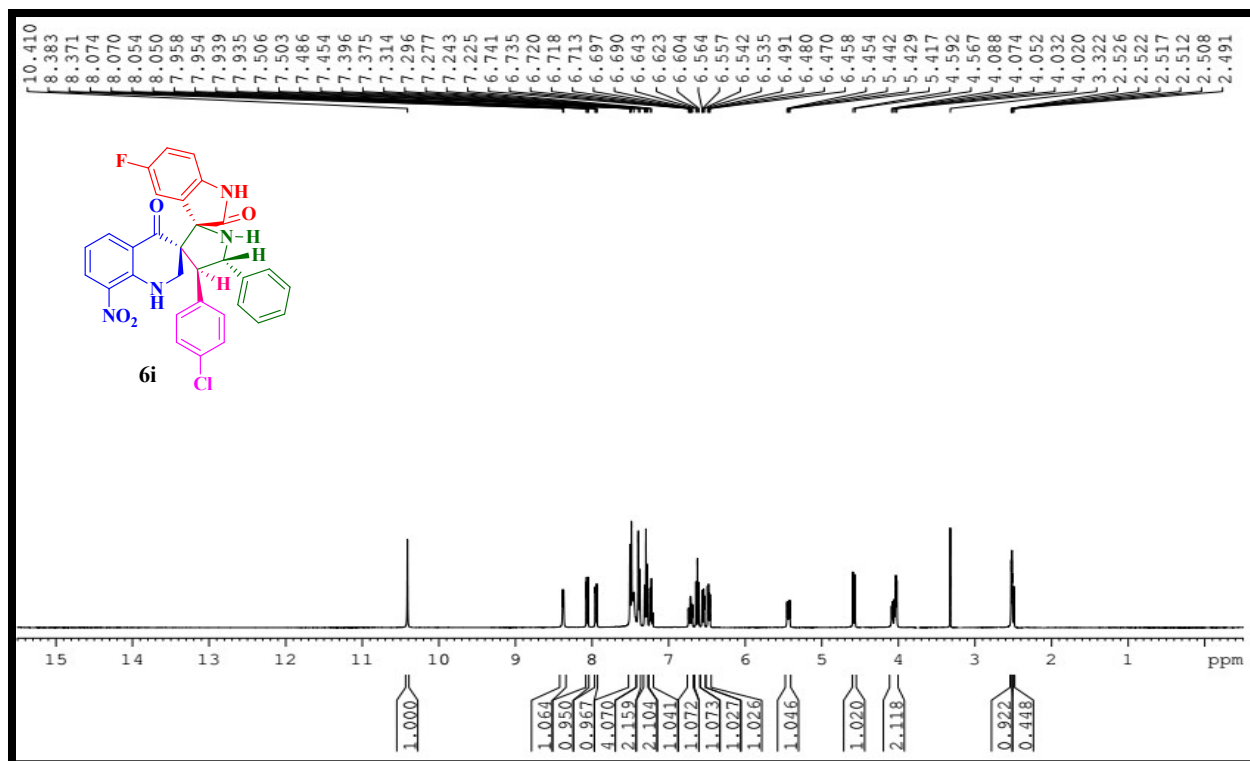

Fig. S28. <sup>1</sup>H NMR spectrum of compound 6i

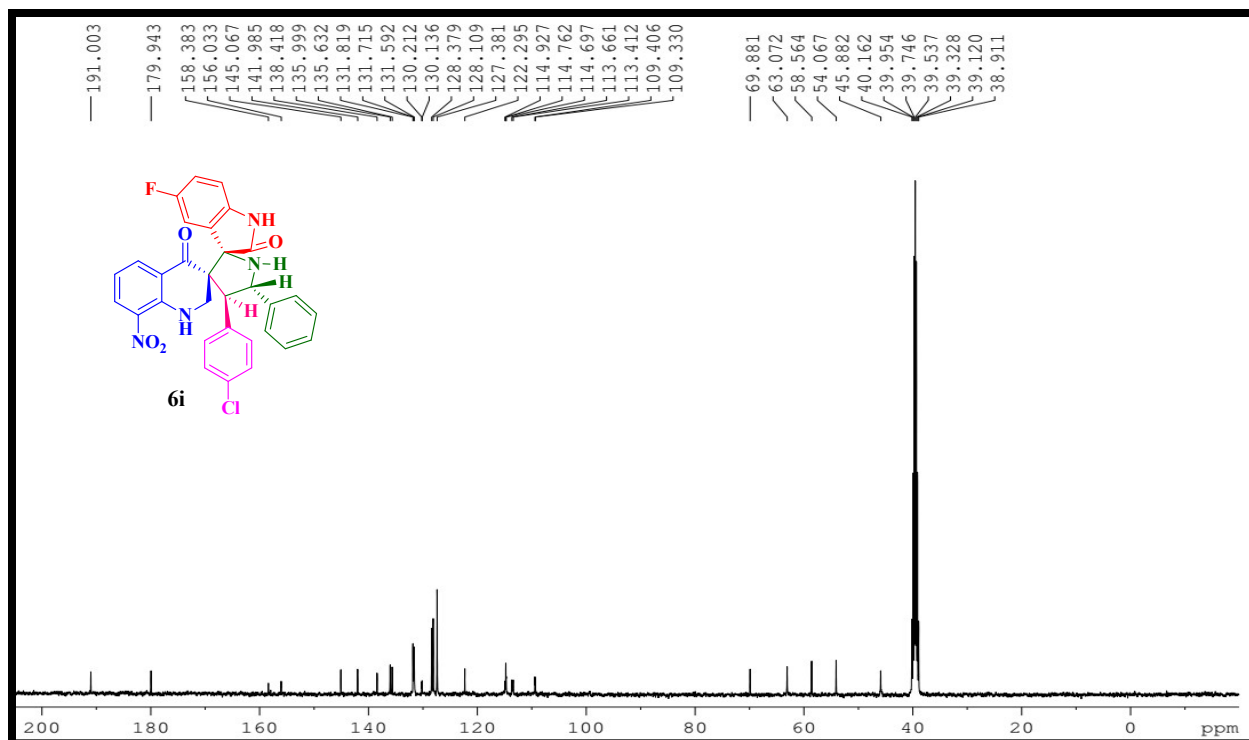

Fig. S29. <sup>13</sup>C NMR spectrum of compound 6i

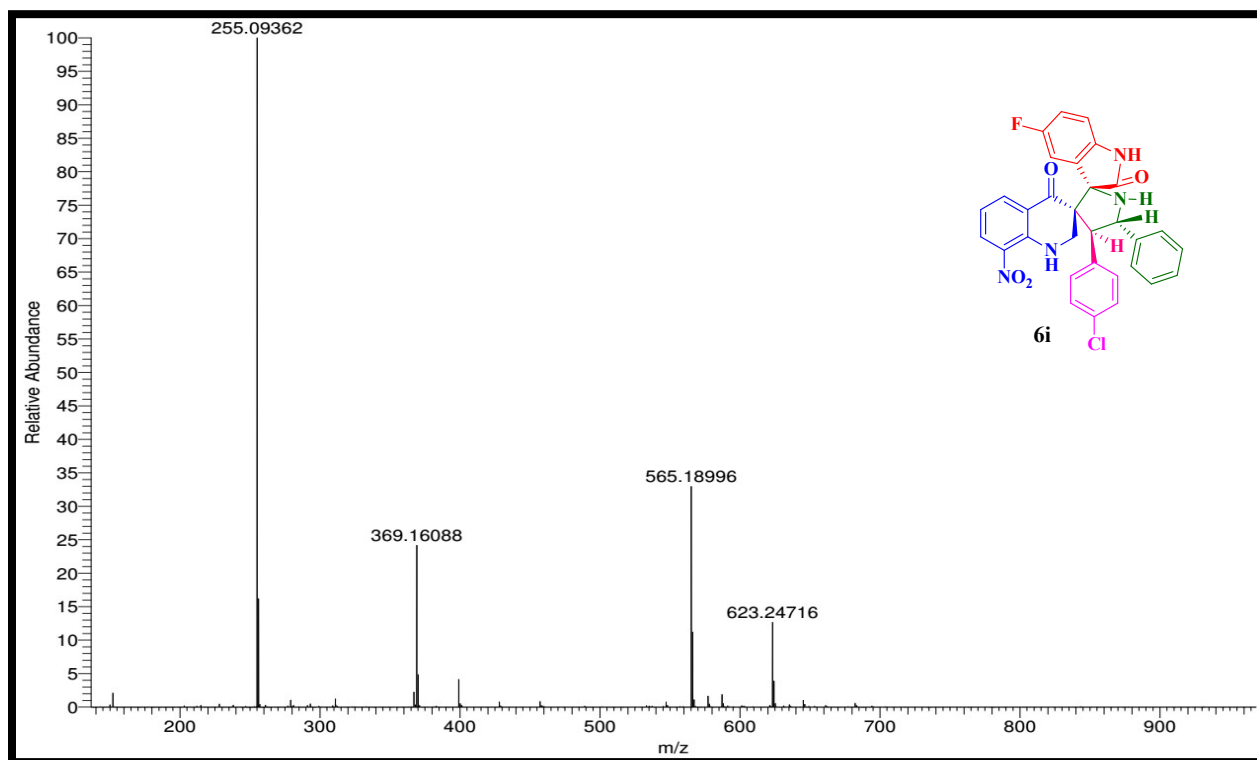

Fig. S30. HRMS spectrum of compound 6i

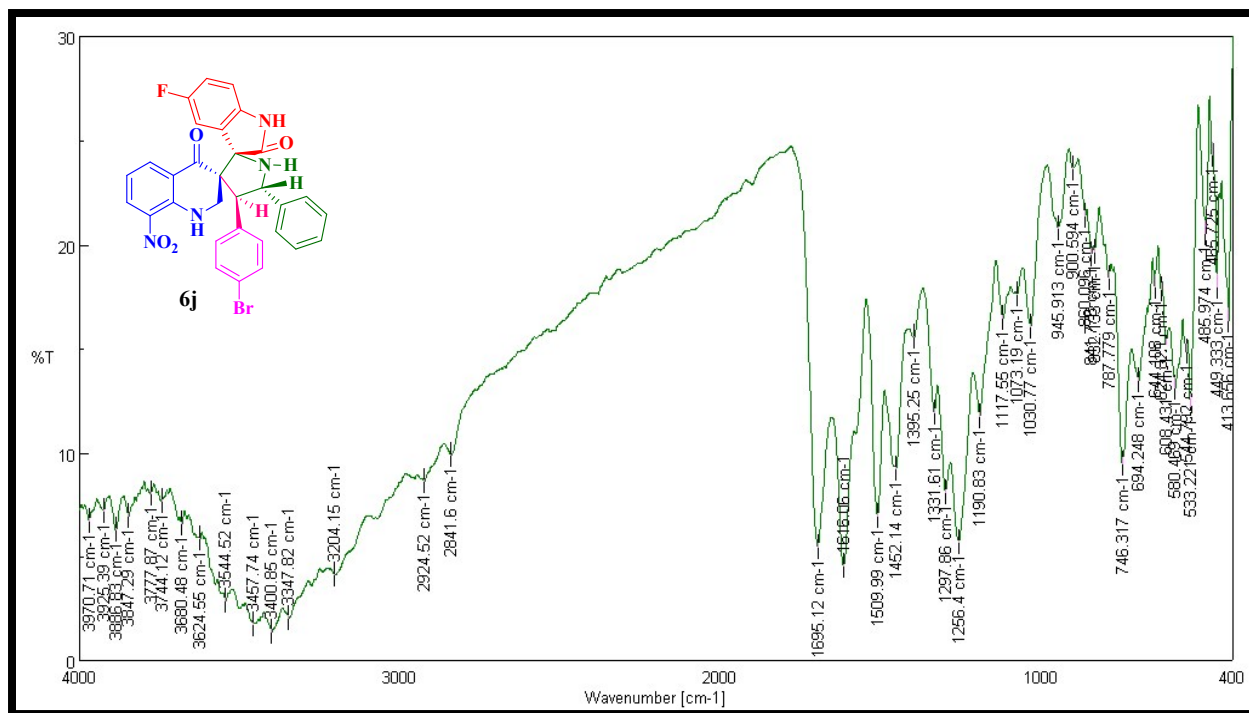

Fig. S31. IR spectrum of compound 6j

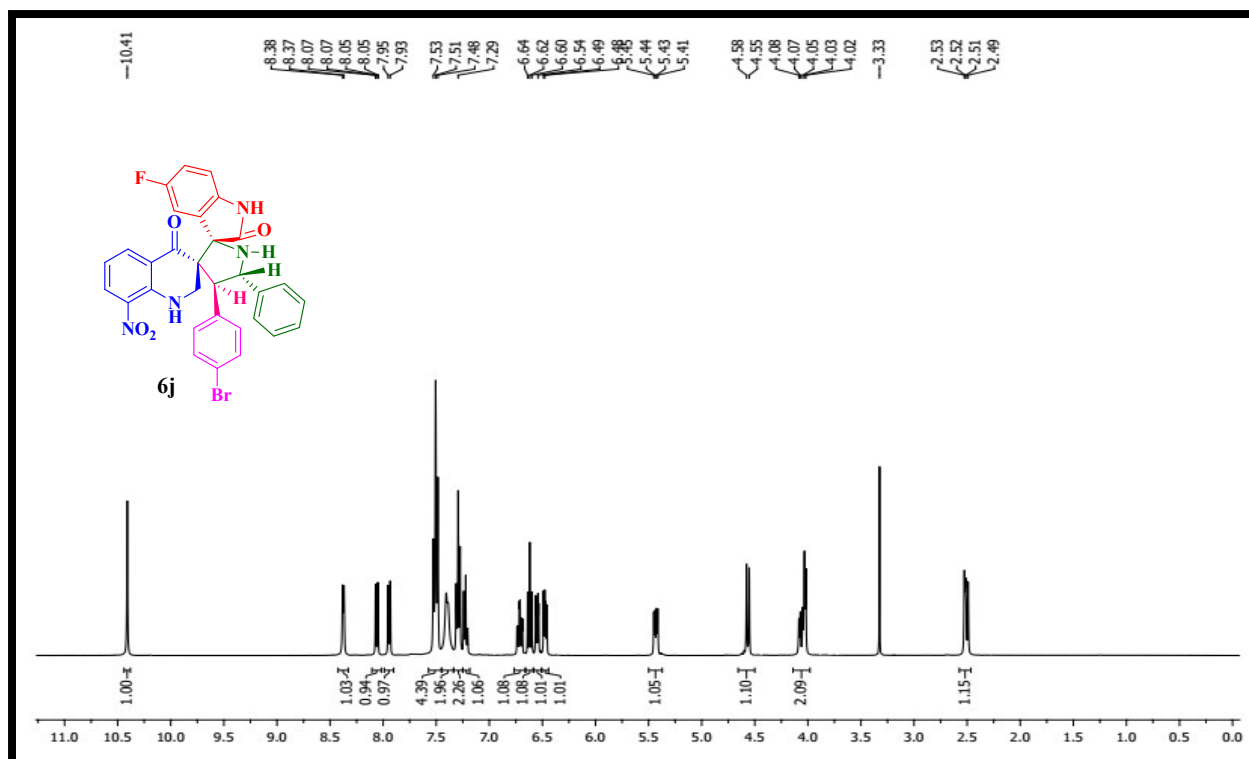

Fig. S32. <sup>1</sup>H NMR spectrum of compound 6j

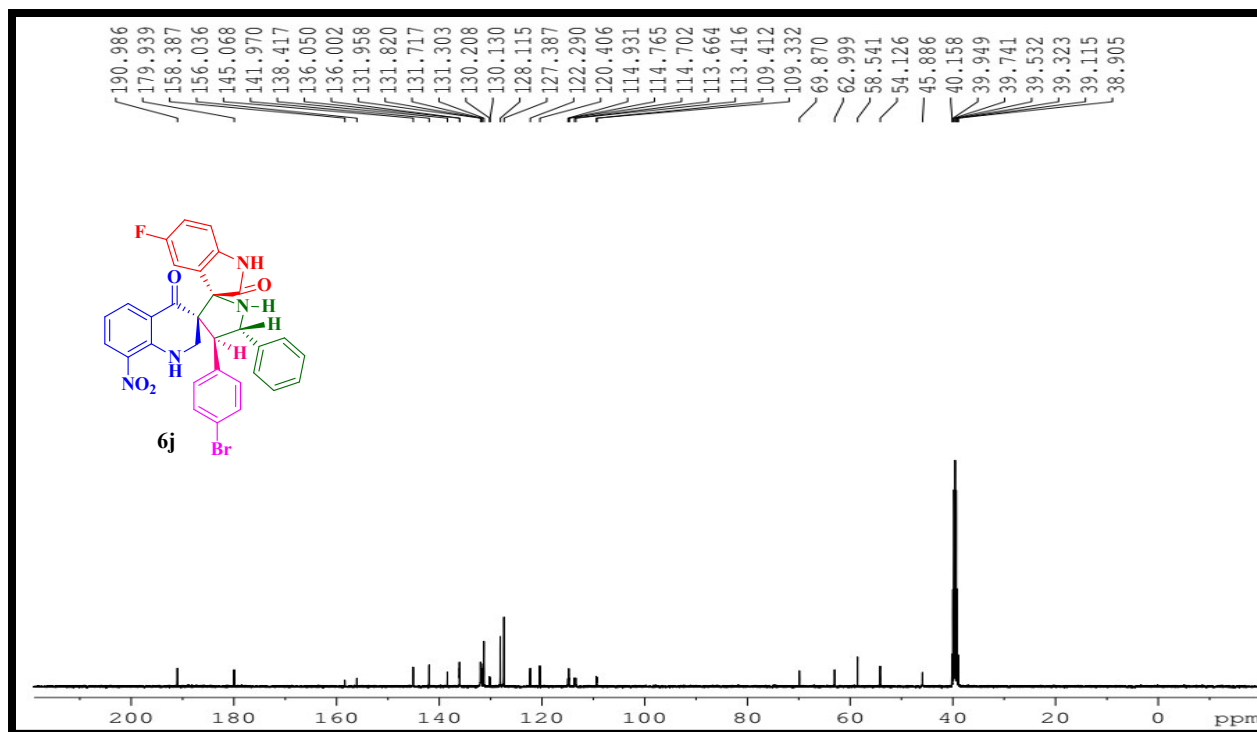

Fig. S33. <sup>13</sup>C NMR spectrum of compound 6j

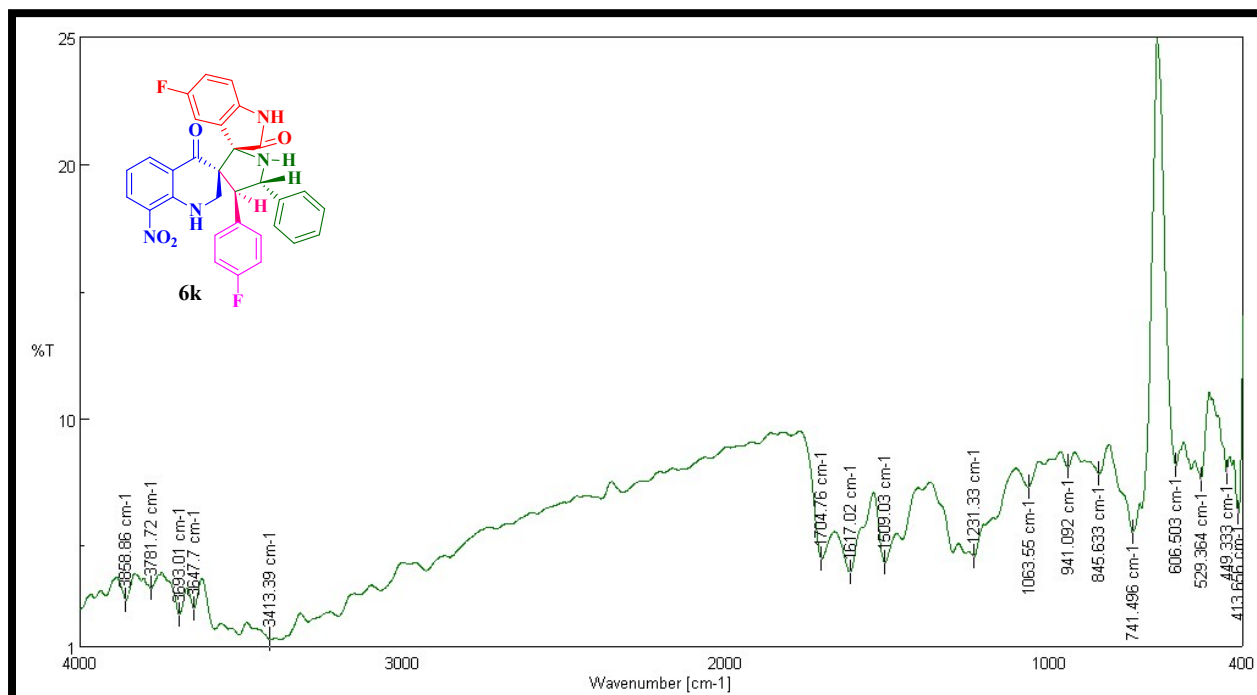

Fig. S34. IR spectrum of compound 6k

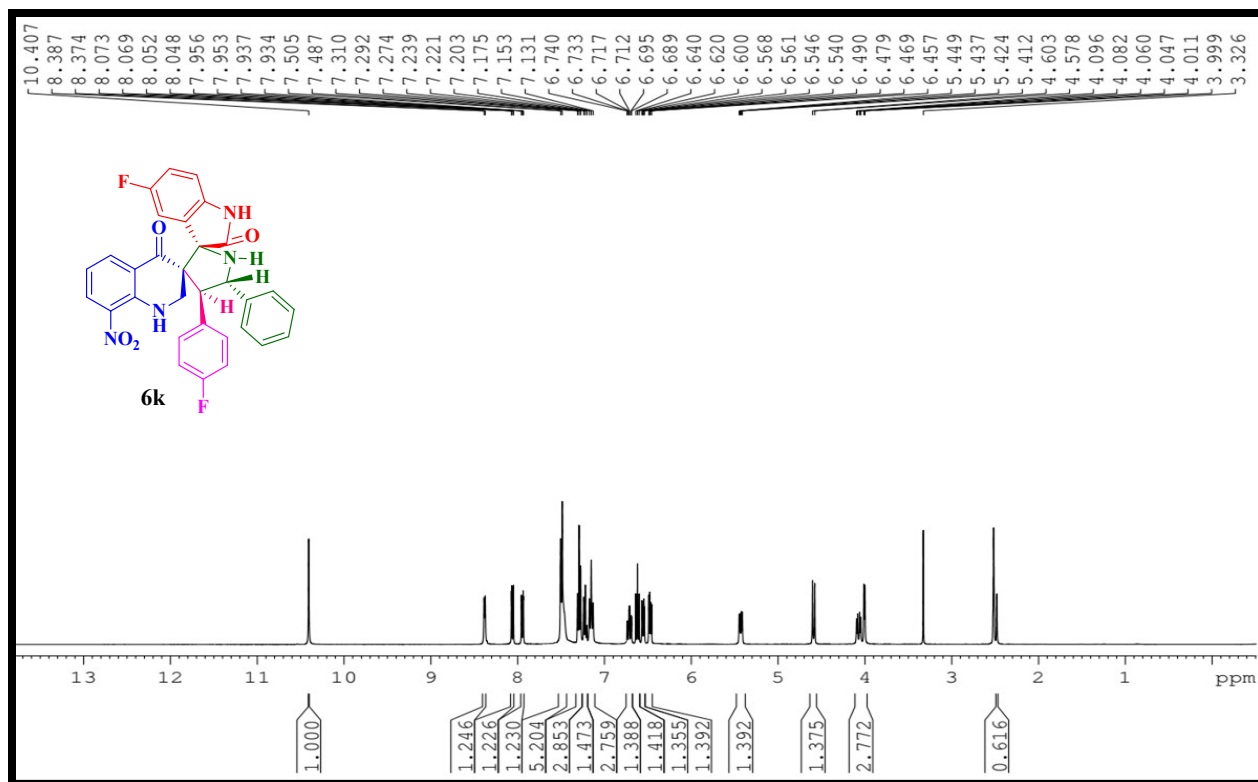

Fig. S35. <sup>1</sup>H NMR spectrum of compound 6k

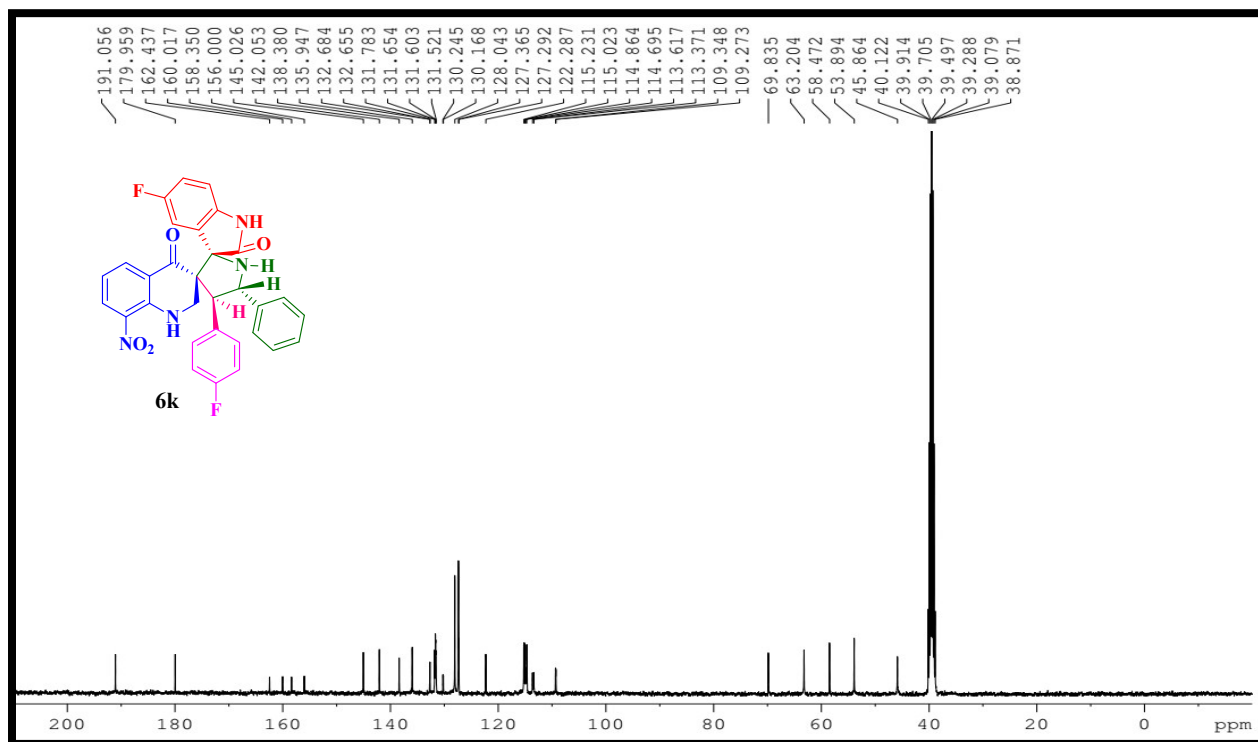

Fig. S36. <sup>13</sup>C NMR spectrum of compound 6k

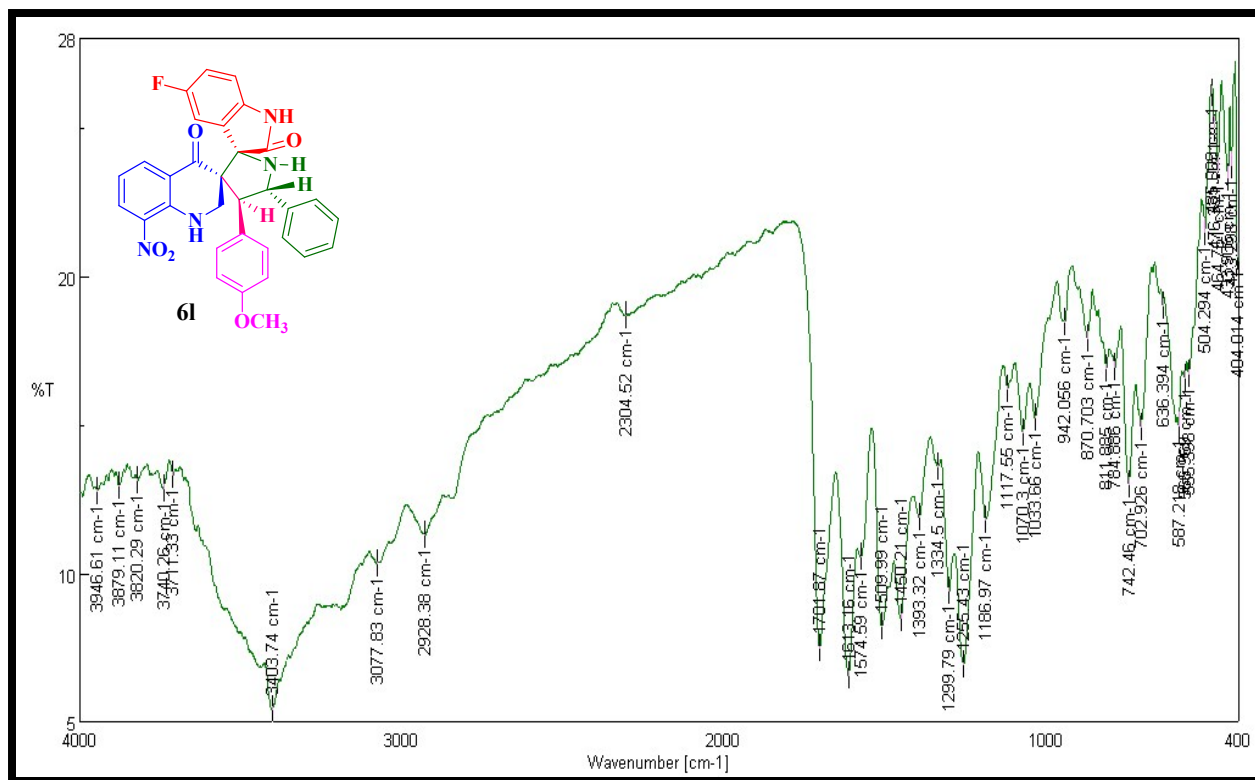

Fig. S37. IR spectrum of compound 6l

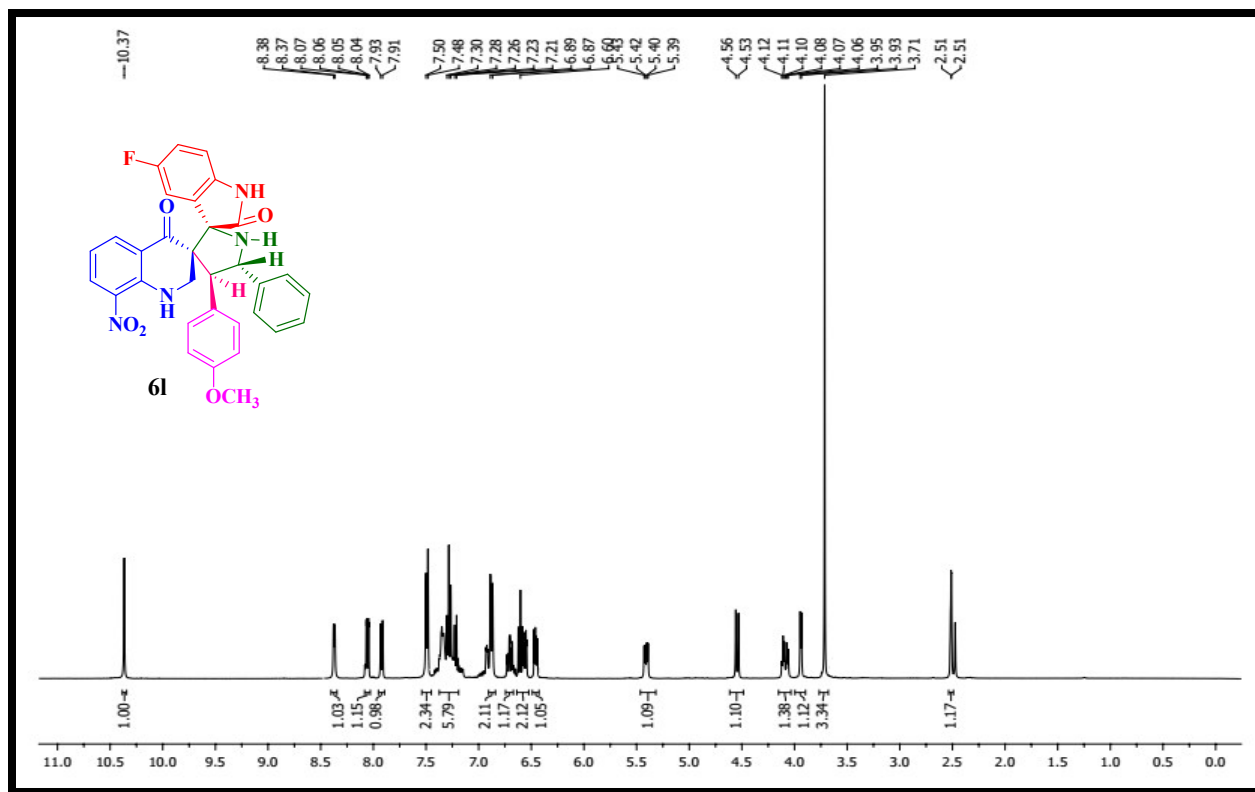

Fig. S38. <sup>1</sup>H NMR spectrum of compound 6l

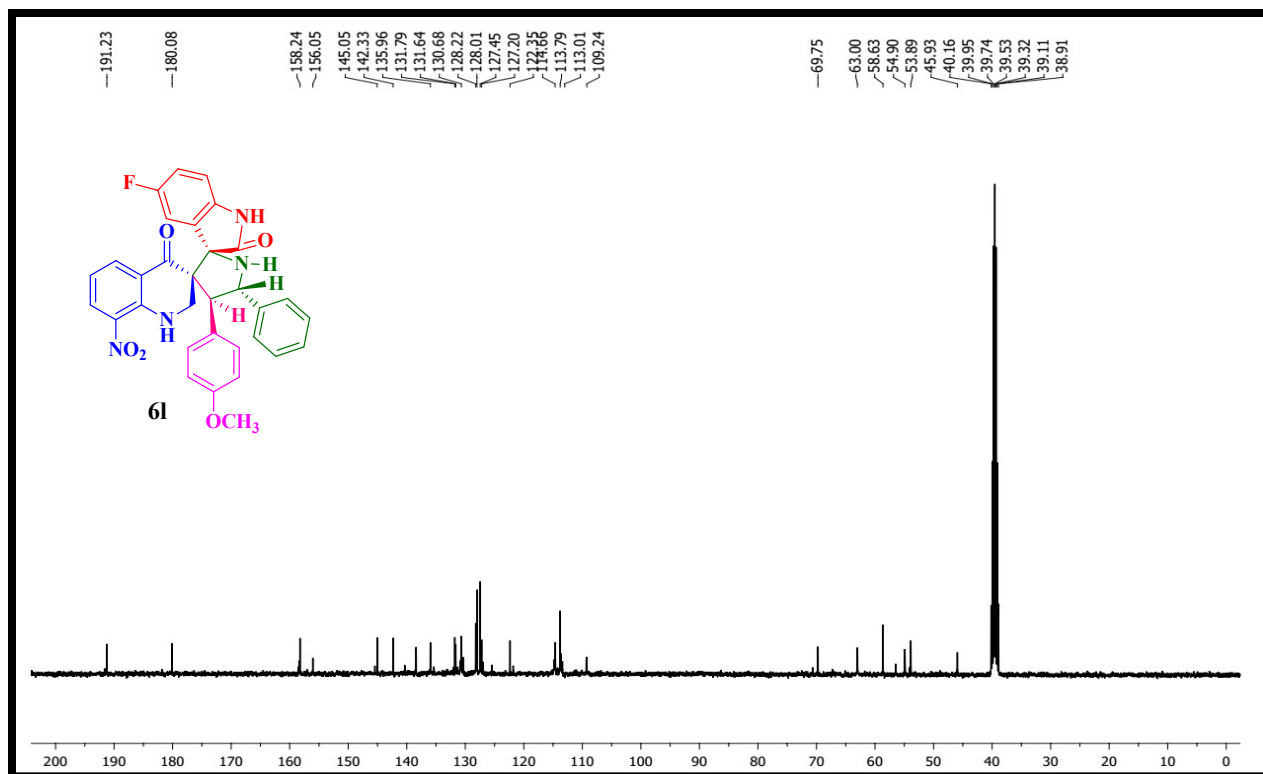

Fig. S39. <sup>13</sup>C NMR spectrum of compound 6l

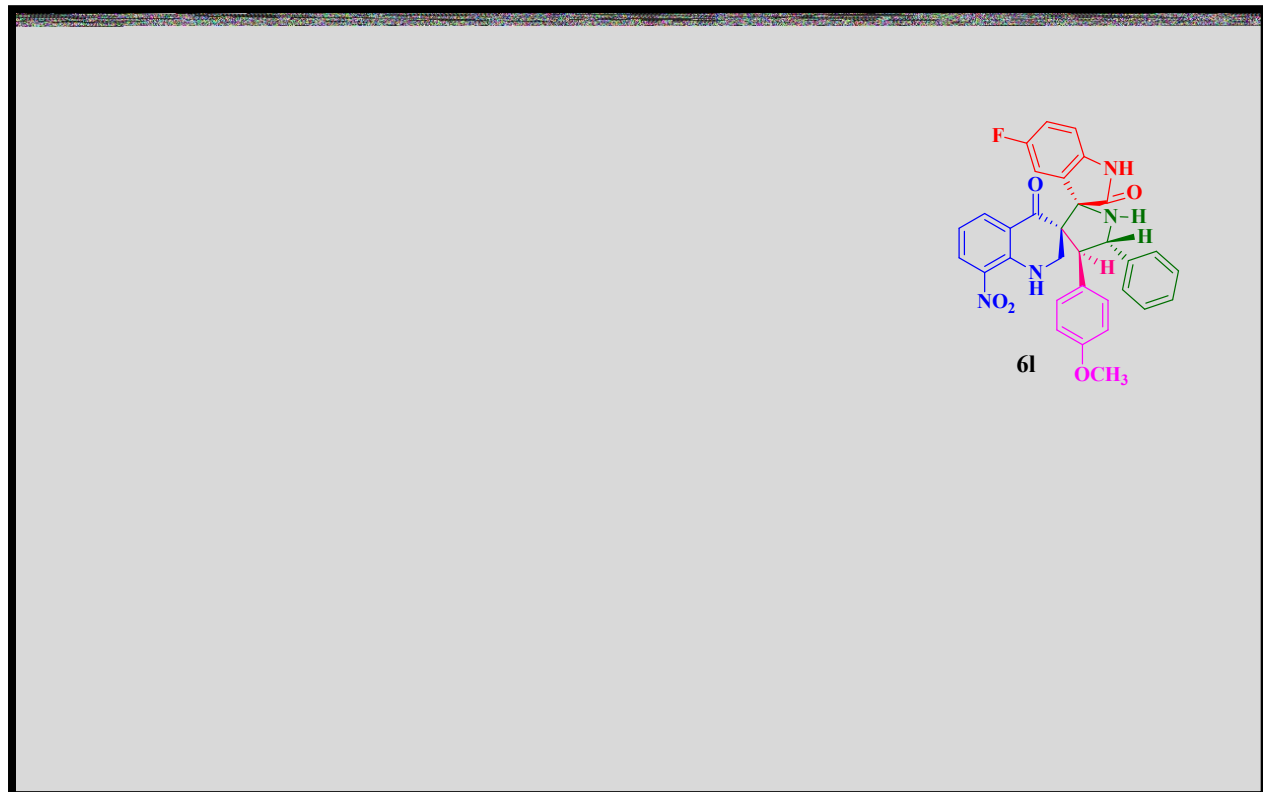

Fig. S40. HRMS NMR spectrum of compound 6l
